# Supplementary material for: A genome-wide association study identifies risk loci for childhood acute lymphoblastic leukemia at 10q26.13 and 12q23.1
Source: PubMed Central journal article supplement (PMC5336191; doi:10.1038/leu.2016.271), 2016-11-11
Supplement: NIHMS69824-supplement-1.pdf [file NIHMS69824-supplement-1.pdf]

## Supplemental Files

### **A genome-wide association study identifies risk loci for childhood acute lymphoblastic leukemia at 10q26.13 and 12q23.1**

Jayaram Vijayakrishnan<sup>1</sup>, Rajiv Kumar<sup>2</sup>, Marc Y.R. Henrion<sup>1</sup>, Anthony V Moorman<sup>4</sup>, P Sivaramakrishna Rachakonda<sup>2</sup>, Ismail Hosen<sup>2</sup>, Miguel Inacio da Silva Filho<sup>2</sup>, Amy Holroyd<sup>1</sup>, Sara E. Dobbins<sup>1</sup>, Rolf Koehler<sup>3</sup>, Hauke Thomsen<sup>2</sup>, Julie A. Irving<sup>4</sup>, James M. Allan<sup>4</sup>, Tracy Lightfoot<sup>5</sup>, Eve Roman<sup>5</sup>, Sally E. Kinsey<sup>6, 7</sup>, Eamonn Sheridan<sup>7</sup>, Pamela D Thompson<sup>8</sup>, Per Hoffmann<sup>9, 16</sup>, Markus M. Nöthen<sup>9</sup>, Stefanie Heilmann-Heimbach<sup>9</sup>, Jöckel Karl-Heinz<sup>11</sup>, Mel Greaves<sup>14</sup>, Christine J. Harrison<sup>4</sup>, Claus R. Bartram<sup>3</sup>, Martin Schrappe<sup>13</sup>, Martin Stanulla<sup>13</sup>, Kari Hemminki<sup>2,15</sup>, Richard S. Houlston<sup>1</sup>.

<sup>1</sup>Division of Genetics and Epidemiology, The Institute of Cancer Research, Sutton, Surrey, United Kingdom;

<sup>2</sup>Division of Molecular Genetic Epidemiology, German Cancer Research Centre, Heidelberg, Germany;

<sup>3</sup>Institute of Human Genetics, University of Heidelberg, Heidelberg, Germany;

<sup>4</sup>Northern Institute for Cancer Research, Newcastle University, Newcastle upon Tyne, United Kingdom;

<sup>5</sup>Epidemiology and Cancer Statistics Group, Department of Health Sciences, University of York, York, United Kingdom;

<sup>6</sup>Department of Paediatric and Adolescent Haematology and Oncology, Leeds General Infirmary, Leeds, United Kingdom;

<sup>7</sup>Leeds Institute of Molecular Medicine, University of Leeds, Leeds, United Kingdom;

<sup>8</sup>Paediatric and Familial Cancer, Institute of Cancer Sciences, Manchester, United Kingdom;

<sup>9</sup>Institute of Human Genetics, University of Bonn, Bonn, Germany;

<sup>10</sup>German Centre for Neurodegenerative Diseases, Bonn, Germany;

<sup>11</sup>Institute for Medical Informatics, Biometry and Epidemiology, University Hospital Essen, University of Duisburg–Essen, Essen, Germany;

<sup>12</sup>Department of Paediatric Haematology and Oncology, Hannover Medical School, Hannover, Germany;

<sup>13</sup>General Paediatrics, University Hospital Schleswig-Holstein, Kiel, Germany;

<sup>14</sup>Haemato-Oncology Research Unit, Division of Molecular Pathology, Institute of Cancer Research, Sutton, Surrey, United Kingdom;

<sup>15</sup>Center for Primary Health Care Research, Lund University, Malmö, Sweden;

<sup>16</sup>Human Genomics Research Group, Department of Biomedicine, University Hospital Basel, Basel, Switzerland;

**Corresponding author: Richard S Houlston; e-mail: [richard.houlston@icr.ac.uk](mailto:richard.houlston@icr.ac.uk); Tel: +44 (0) 208 722 4175; Fax: +44 (0) 208 722 4365**

## SUPPLEMENTARY FIGURES AND TABLES

**Figure S1: Quantile-Quantile (Q-Q) plots of observed and expected  $\chi^2$  values of association between all QC filtered SNP genotype and risk of BCP-ALL after imputation with  $\lambda_{100}$  values shown.** (a) UK and (b) Germany. The red line represents the null hypothesis of no true association.

**Figure S2: Manhattan plot of association P-values.** Shown are the genome-wide P values (two sided;  $-\log_{10}P < 10.0$ ) of 11.7 million successfully imputed autosomal SNPs with in a total of 1,658 cases and 7,224 controls from the discovery-phase. Labeled in black are previously identified risk loci and labeled in red are newly identified risk loci. SNPs within 100kb of rs35837782(10q26.13) and rs4762284(12q23.1) are highlighted in green.

**Figure S3: Forest plots of ORs for childhood ALL with rs35837782 and rs4762284 genotype.** ORs for all BCP-ALL (A), Hyperdiploid (B), ETV6-RUNX1 (C), Other:Non-Hyperdiploid/ETV6-RUNX1 ALL (D).OR: odds ratio; CI: confidence intervals Phet :P -value for heterogeneity. I<sup>2</sup> : variation attributable to heterogeneity.

**Figure S4: Kaplan-Meier curves of patient survivorship in BCP-ALL patients.** (a-f) Stratified by rs35837782 (10p14) and rs4762284 (g-l) genotype. EFS: Event Free Survivorship; SR: standard risk; HR: higher risk; MR: medium risk; CI: cumulative incidence.

**Figure S5: Population distribution of childhood ALL relative scores ordered by genetic risk (risk is relative to population median risk).** The blue line plots the distribution of RR across the population;the red lines correspond to 1<sup>st</sup>, 10<sup>th</sup> 90<sup>th</sup> and 99<sup>th</sup> centiles. The RR figures presented in black are the average in the (i) highest 10 and (ii) top 1 centile of genetic risk.

**Table S1: Summary statistics for novel variants showing an association with BCP-ALL risk in the GWAS meta-analysis after QC.** a: Shown are discovery association P values for individual studies and from meta-analysis of GWAS datasets. a. P-values under a fixed effects model. b. P-values under a random effects model c:OR Odds ratios derived with respect to the risk allele.RAF: risk allele frequency in discovery cases. \*SNPs which were genome-wide significant after replication genotyping.# rs6933843 was used a proxy to rs6569588 which was the top ranking SNP in that candidate loci.

**Table S2: Imputation quality scores and concordance between directly sequenced and imputed genotype. (a) SNPs which were genome-wide significant after replication; (b) SNPs which were not genome-wide significant after replication.** AA, major homozygote; AB, heterozygote; BB, minor homozygote; Is, Information score giving an indication of imputation quality.  $r^2$  indicates Pearson product-moment correlation coefficient between imputed and sequenced genotype.

**Table S3: Replication series for BCP-ALL GWAS.** Candidate SNPs genotyped in UK Replication 1 and German Replication series, SNPs nominally significant (i.e.  $P < 0.05$ ) in both series combined were genotyped in a third UK Replication series 2 to identify novel risk

factors. CHR: Chromosome, POS: Position in Hg19 build, A1/A2: Alleles, P-value obtained under a logistic regression model.

**Table S4: Relationship between SNP genotype and ALL subtype.** RAF: Risk Allele Frequency, OR: Odds Ratio, P-value obtained from logistic regression.

**Table S5: Conditional analysis of SNPs significant in 9p21.3 region and newly claimed independent SNP rs77728904.** P-values obtained from a meta-analysis of B cell ALL UK and German GWAS series after imputation with UK10k and 1KG reference panels. rs3731249 is the recently described low frequency variant by Vijayakrishnan et al. P-values\* obtained through meta-analysis under a fixed model.

**Table S6: Relationship between genotype and specific tumor karyotype.** P-values are given for case only analysis, along with corresponding numbers (n) and risk allele frequencies (RAF) in parenthesis.\*status for selected chromosome anomalies.<sup>§</sup>CDKN2A deletion status available for combined UK replication 1 and 2 data sets.

**Table S7. Hazard ratios for an event for rs35837782 and rs4762284 by genotype.** a.in comparison to heterozygous patients.

**Table S8. Multivariate hazard ratios for an event for rs35837782 and rs4762284 by genotype.**

**Table S9: Epigenetic annotation of genome-wide significant SNPs.** Data are shown for query SNPs and their proxies ( $r^2 > 0.2$  in 1000 Genomes EUR Phase 1 data) demonstrating evidence of histone marks, DNase hypersensitivity sites or transcription factor occupancy in RegulomeDB analysis. Also indicated are genomic evolutionary rate profiling (GERP) scores and combined annotation dependent depletion (CADD) scores. Chr, chromosome; DNase HS, DNase hypersensitivity; Fre, frequency; GERP, Genomic Evolutionary Rate Profiling; LD, linkage disequilibrium; Pos, position; CADD, combined annotation dependent depletion. RegulomeDB scores: 2b, TF binding + any motif + Dnase Footprint + Dnase peak; 4, TF binding + DNase peak; 5, TF binding or Dnase peak; 6, other binding or Dnase peak.

**Table S10: eQTL analysis in LCL and blood tissues for rs4762284 using the eQTL blood browser online resources.** Genes within 1 Mb of query SNP were assessed for association. \*FDR: False discovery rate values shown are from 'probe level' rates as described by Westra H. et al, Nat.Gen (2012).

**Table S11: Oligonucleotides used for KASPAR genotyping and Sanger sequencing.**

a.

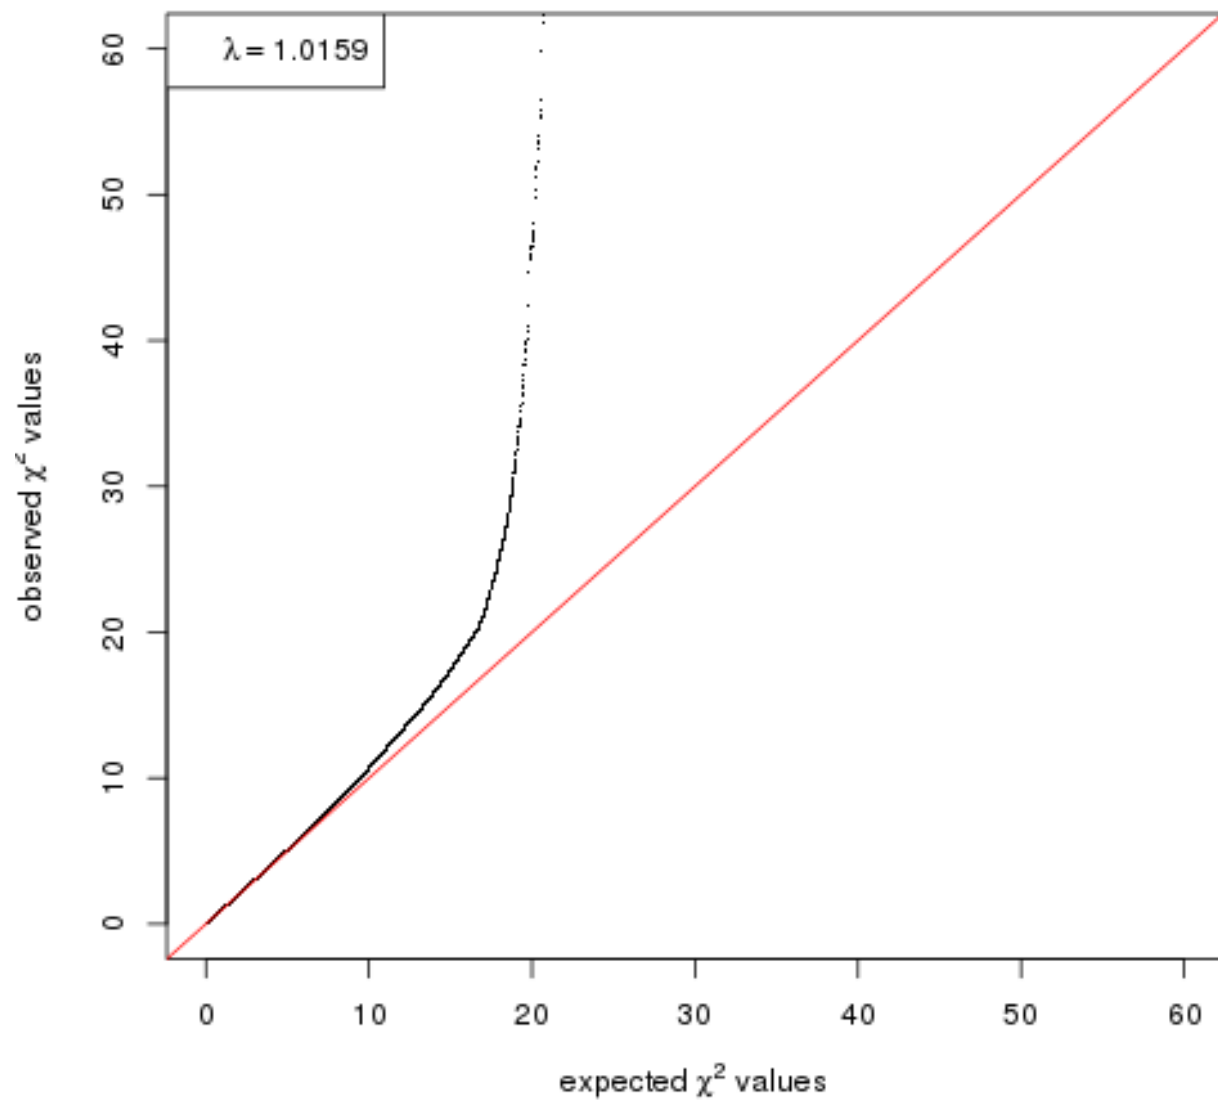

b.

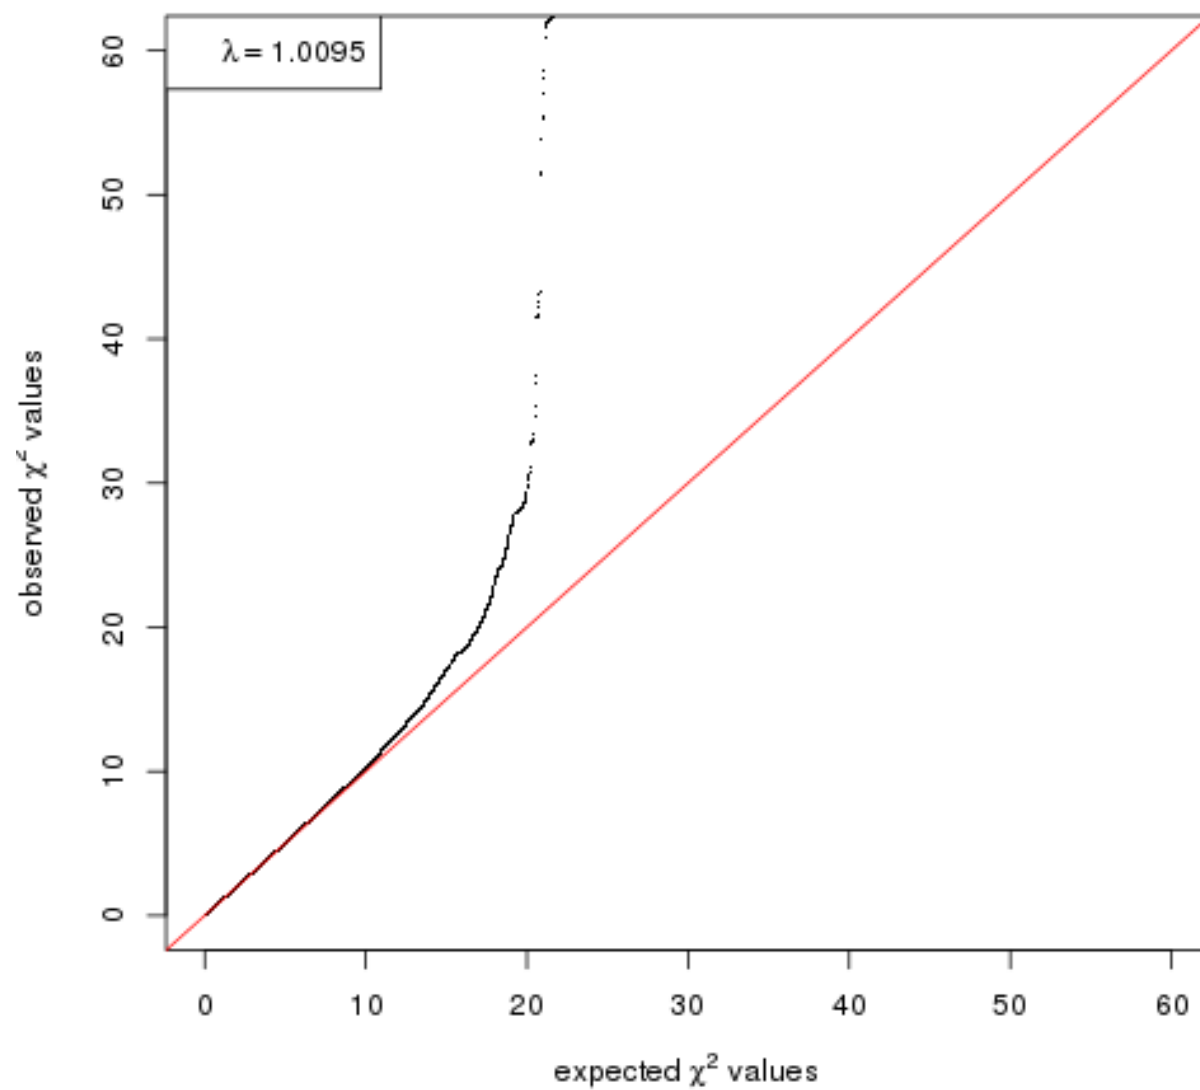

**Figure S1: Quantile-Quantile (Q-Q) plots of observed and expected  $\chi^2$  values of association between all QC filtered SNP genotype and risk of BCP-ALL after imputation with  $\lambda_{100}$  values shown. (a) UK and (b) Germany. The red line represents the null hypothesis of no true association.**

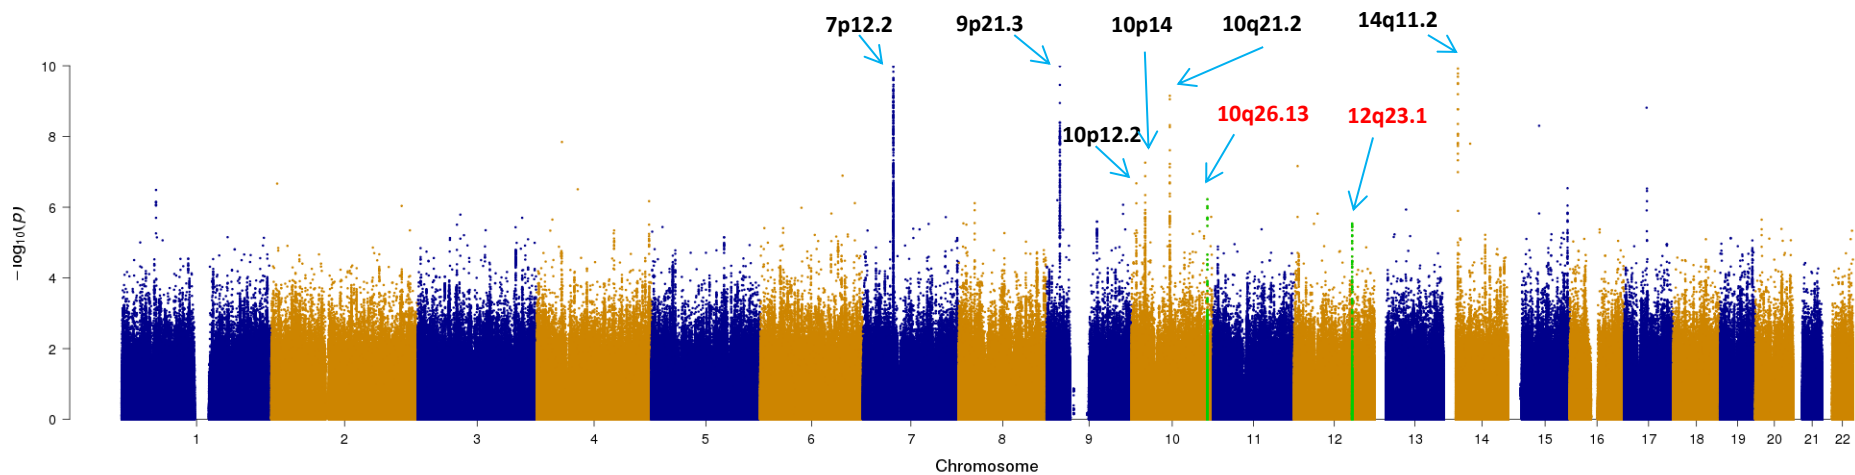

**Figure S2: Manhattan plot of association P-values.** Shown are the genome-wide  $P$  values (two sided;  $-\log_{10}P < 10.0$ ) of 11.7 million successfully imputed autosomal SNPs with in a total of 1,658 cases and 7,224 controls from the discovery-phase. Labeled in black are previously identified risk loci and labelled in red are newly identified risk loci. SNPs within 100kb of rs35837782(10q26.13) and rs4762284(12q23.1) are highlighted in green.

A

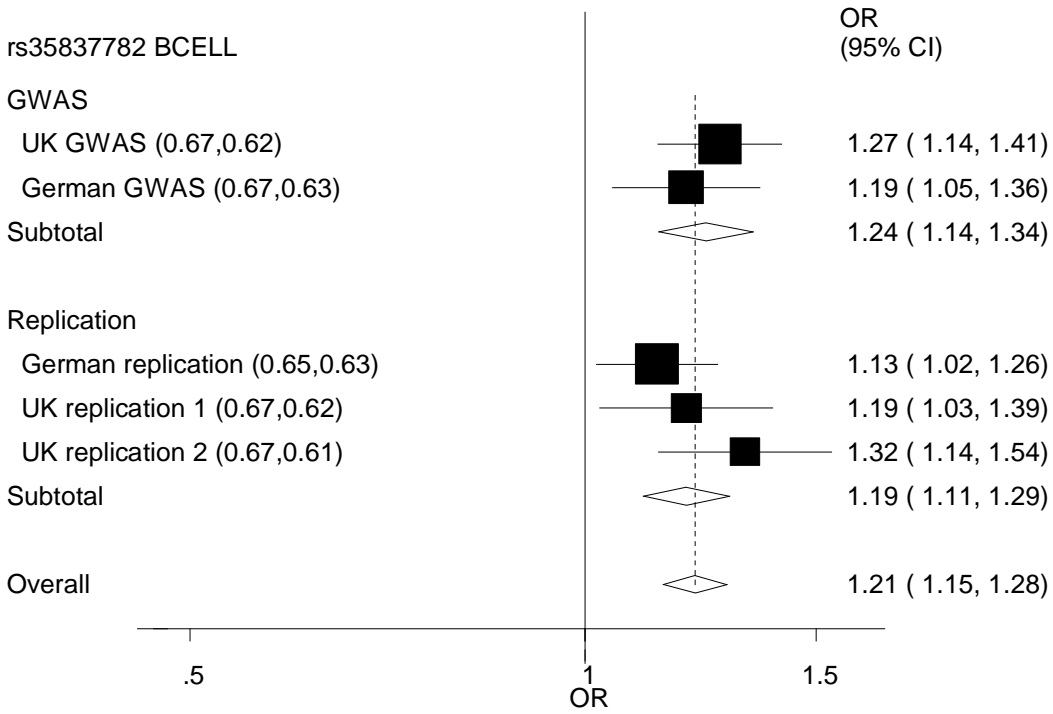

$P\text{-value} = 1.38 \times 10^{-11}$ ;  $P_{het} = 0.48$ ,  $I^2 = 0\%$

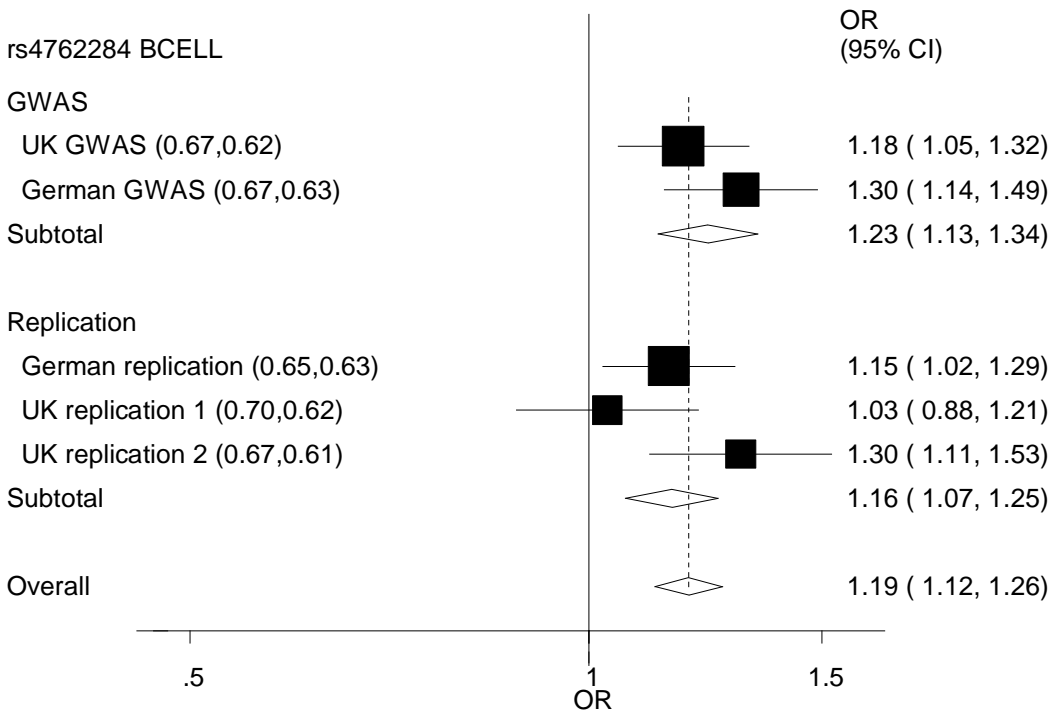

$P\text{-value} = 8.41 \times 10^{-9}$ ;  $P_{het} = 0.17$ ,  $I^2 = 38\%$



**B**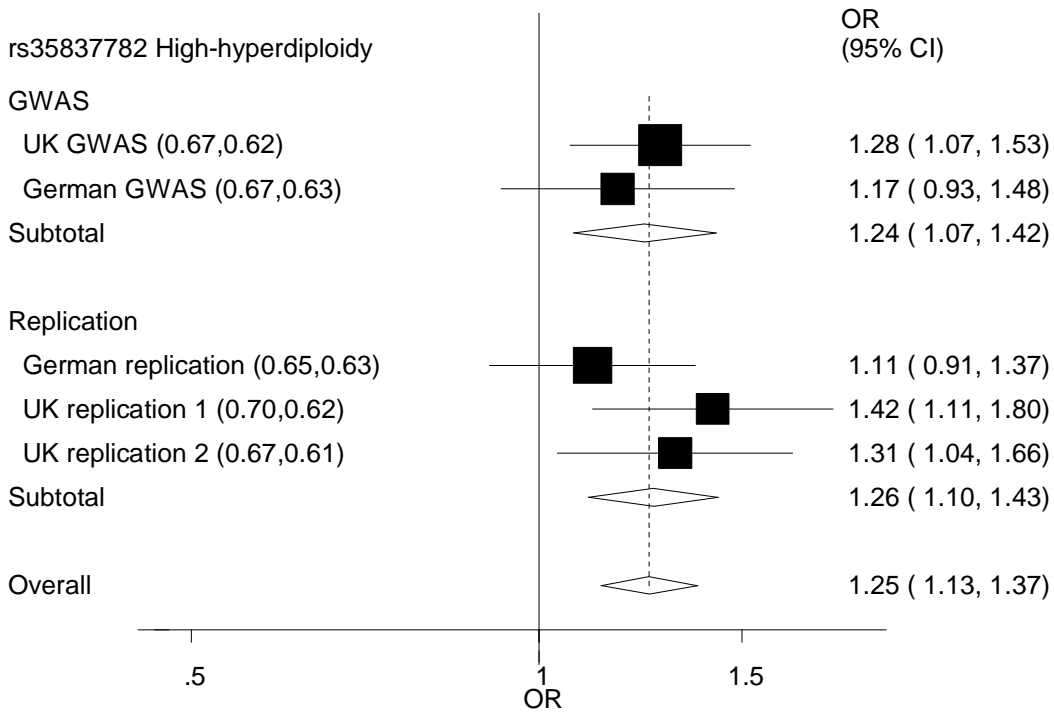

$P\text{-value} = 6.79 \times 10^{-6}$ ;  $P_{het} = 0.60$ ,  $I^2 = 0\%$

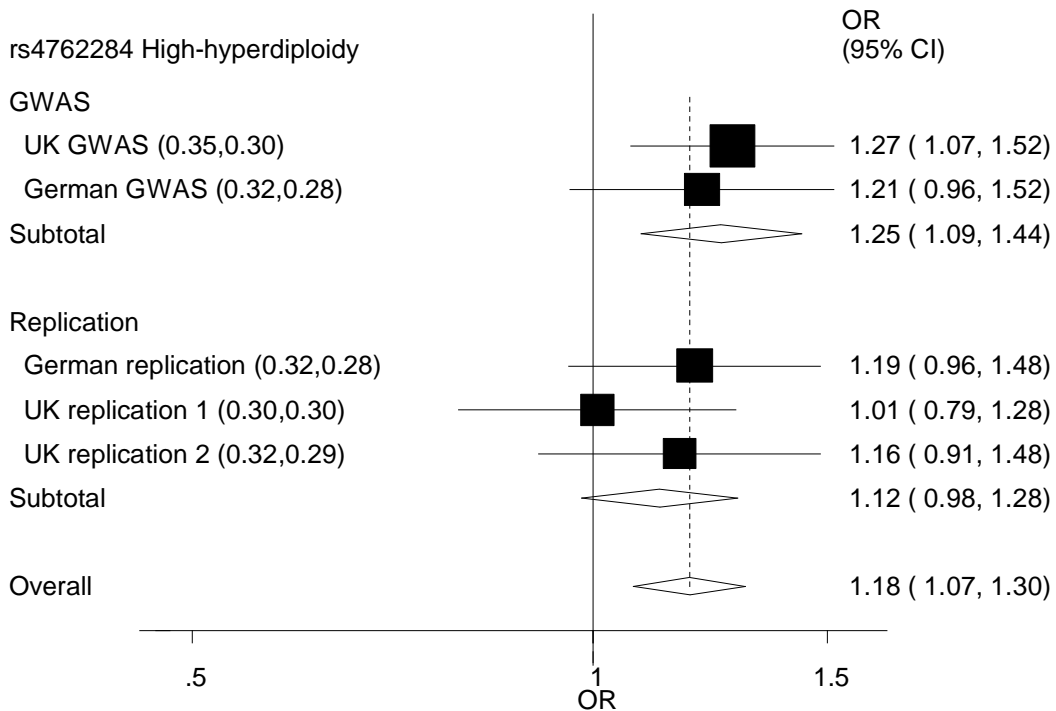

$P\text{-value} = 7.24 \times 10^{-4}$ ;  $P_{het} = 0.66$ ,  $I^2 = 0\%$

C

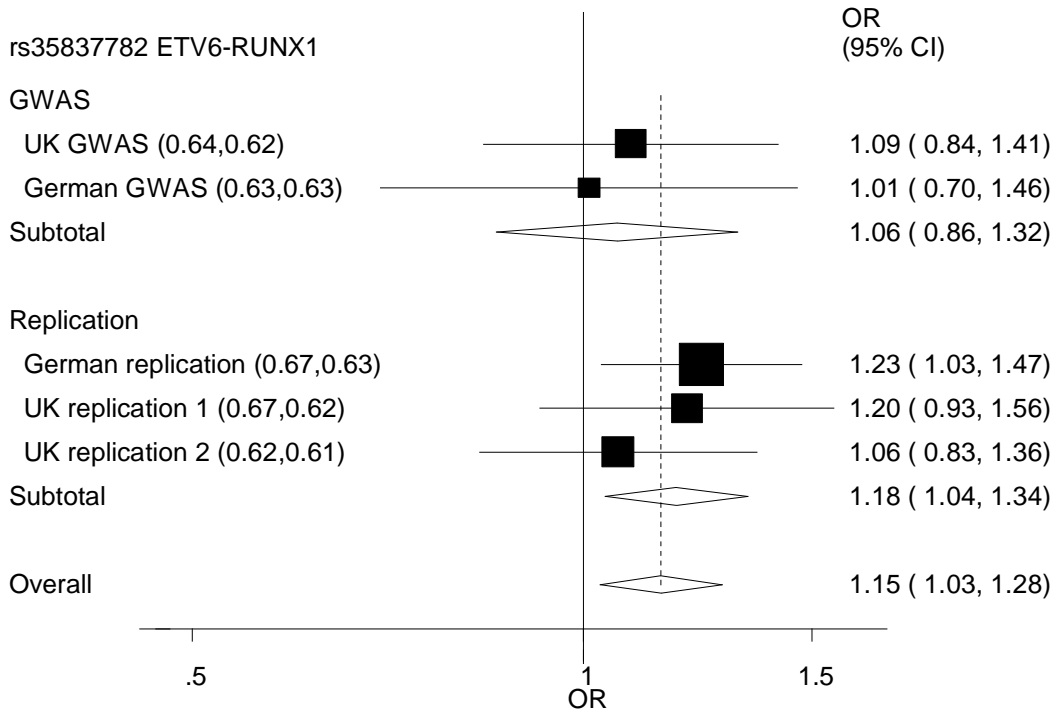

$P\text{-value} = 0.01; P_{het} = 0.76, I^2 = 0\%$

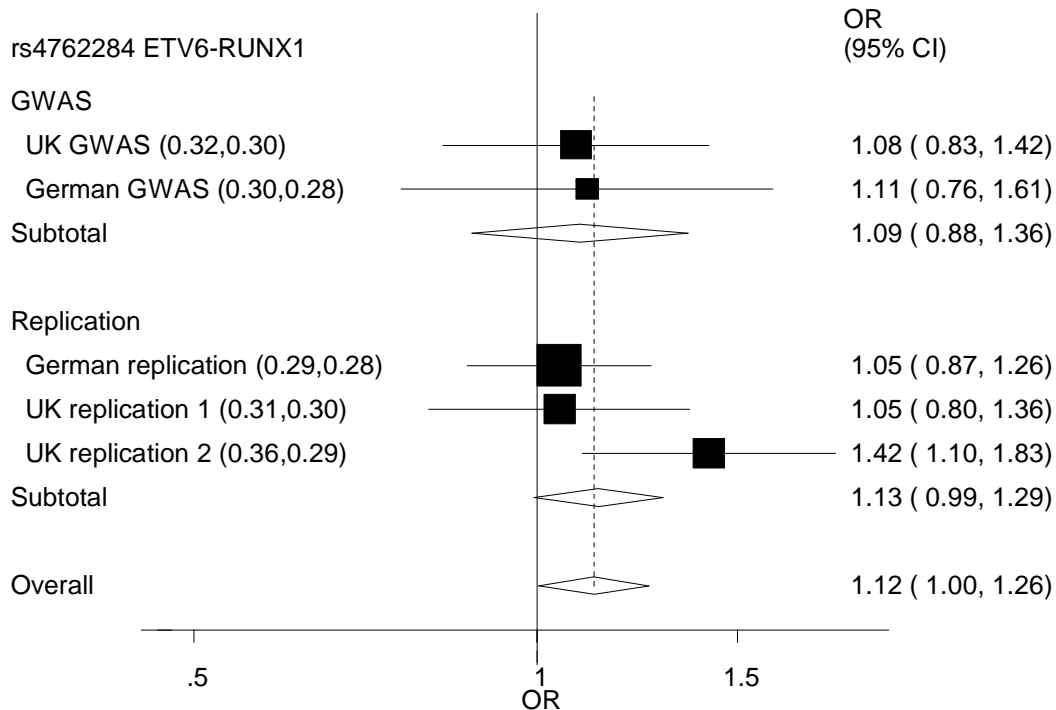

$P\text{-value} = 0.05; P_{het} = 0.40, I^2 = 1.5\%$

D

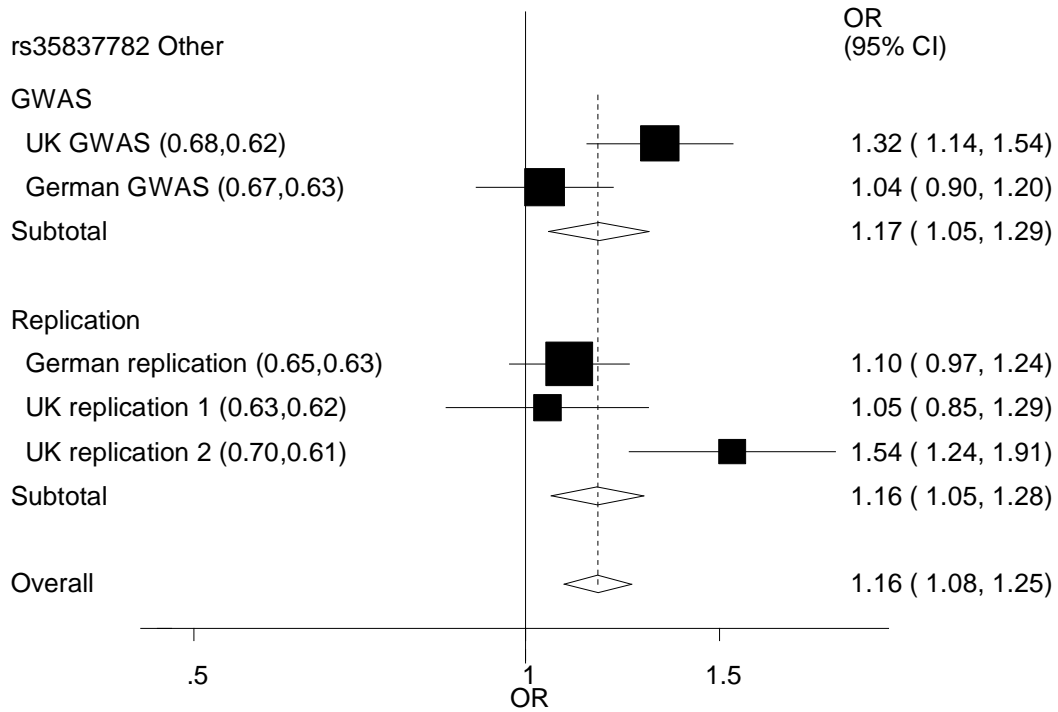

$P\text{-value} = 2.91 \times 10^{-5}$ ;  $P_{het} = 0.01$ ,  $I^2 = 70\%$

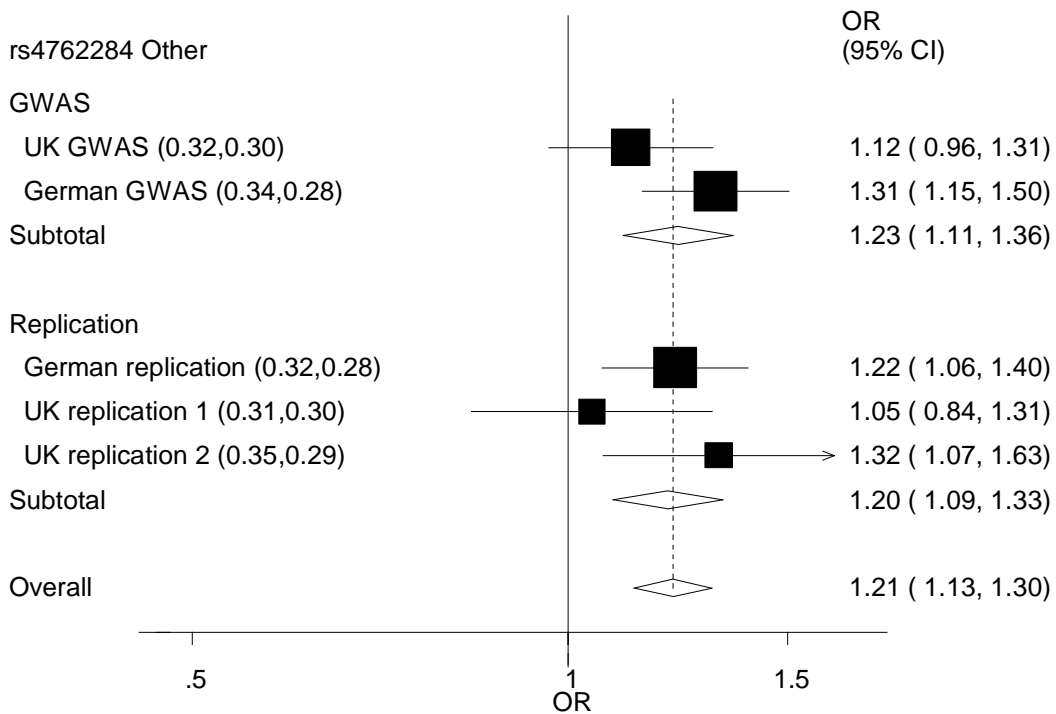

$P\text{-value} = 1.16 \times 10^{-7}$ ;  $P_{het} = 0.33$ ,  $I^2 = 14\%$

**Figure S3: Forest plots of ORs for childhood ALL with rs35837782 and rs4762284 genotype.** ORs for all BCP-ALL (A), Hyperdiploid (B), ETV6-RUNX1 (C), Other:Non-Hyperdiploid/ETV6-RUNX1 ALL (D).OR: odds ratio; CI: confidence intervals  $P_{het}$  : $P$  -value for heterogeneity.  $I^2$  : variation attributable to heterogeneity.

a. ALL-BFM 2000 EFS (5 years)

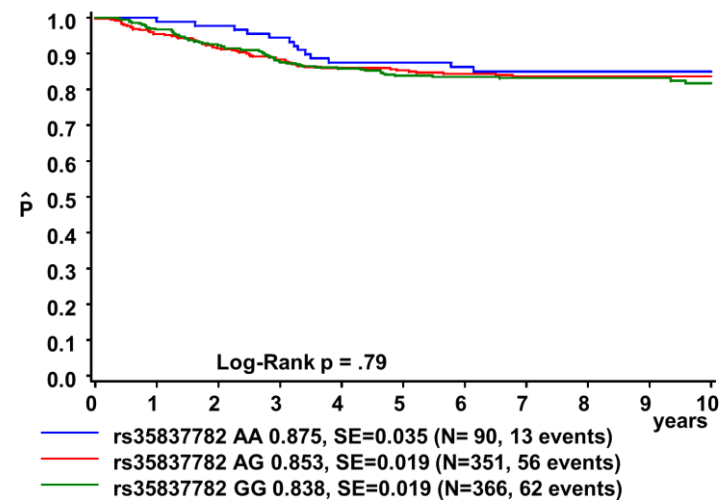

b. ALL-BFM 2000 Survival (5 years)

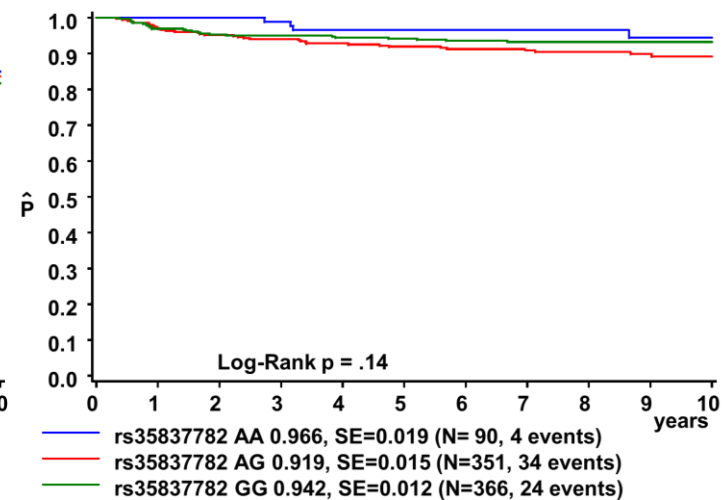

c. ALL-BFM 2000 CI at 5 Y.

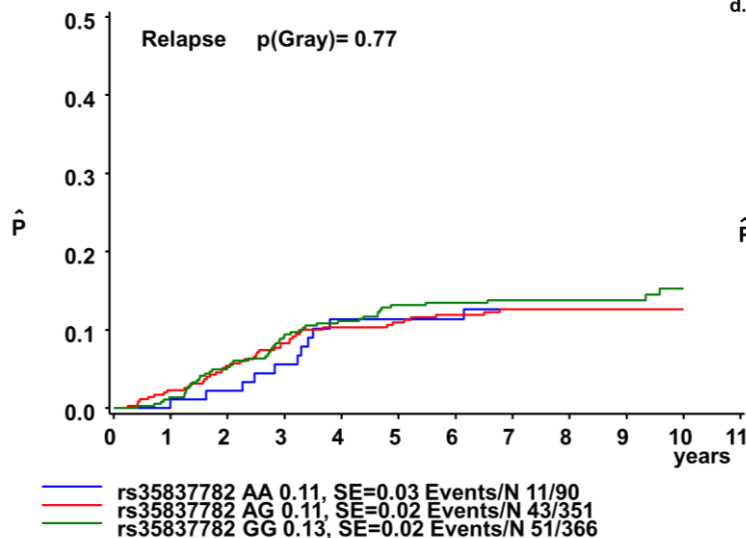

d. ALL-BFM 2000 SR EFS (5 years)

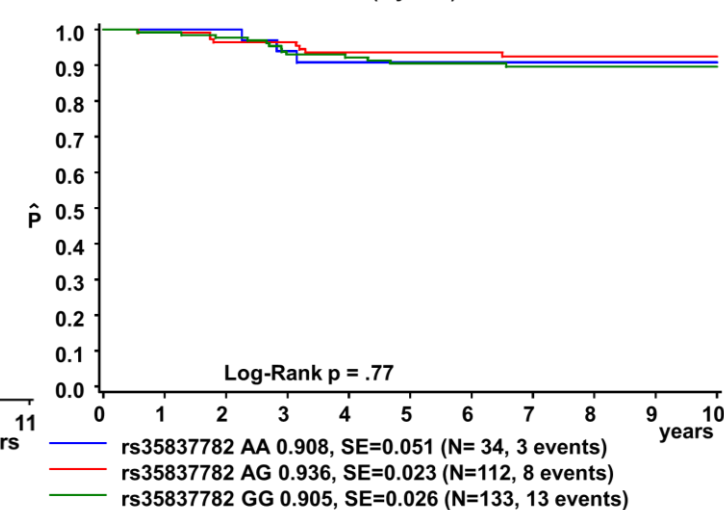

e. ALL-BFM 2000 MR EFS (5 years)

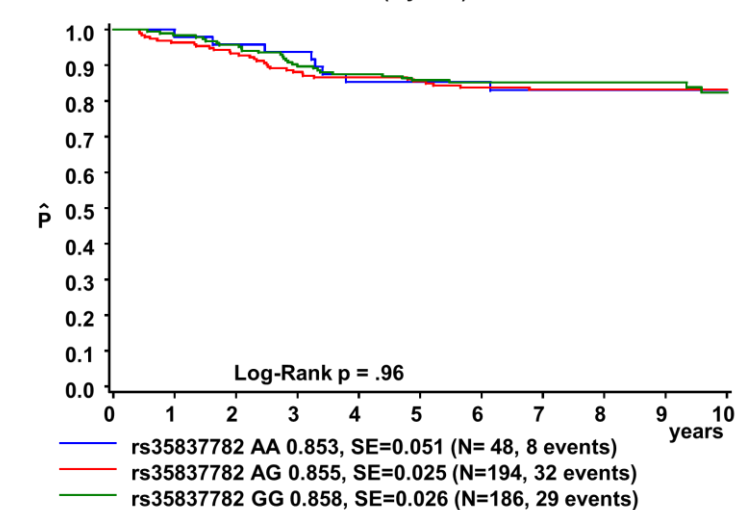

f. ALL-BFM 2000 HR EFS (5 years)

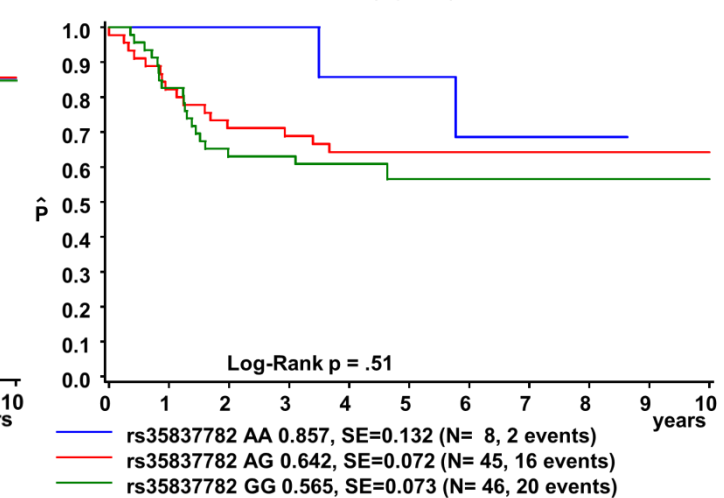

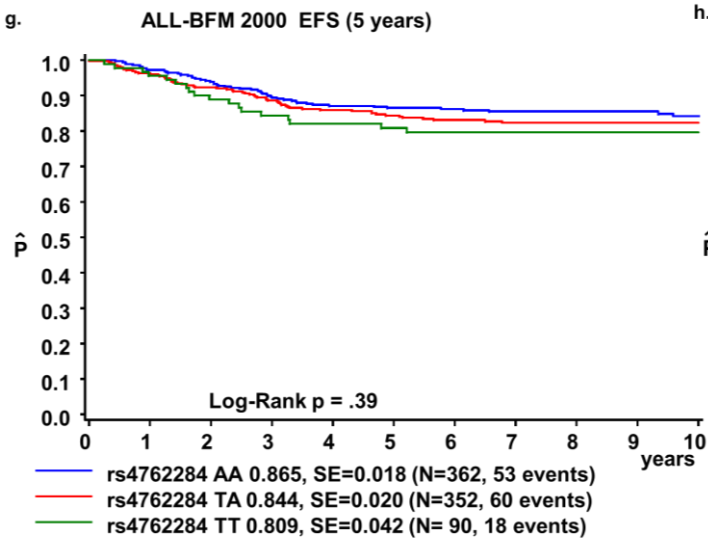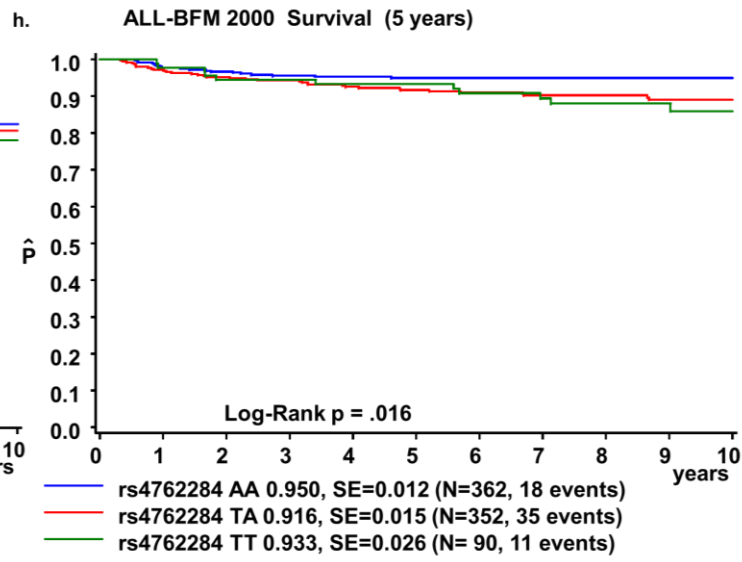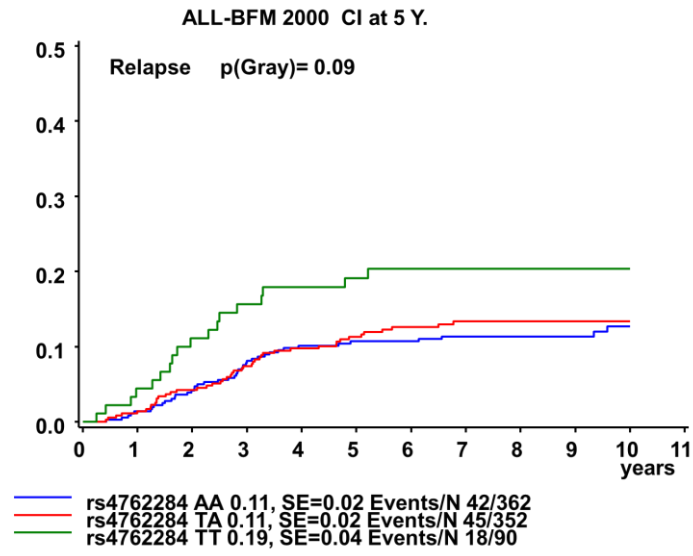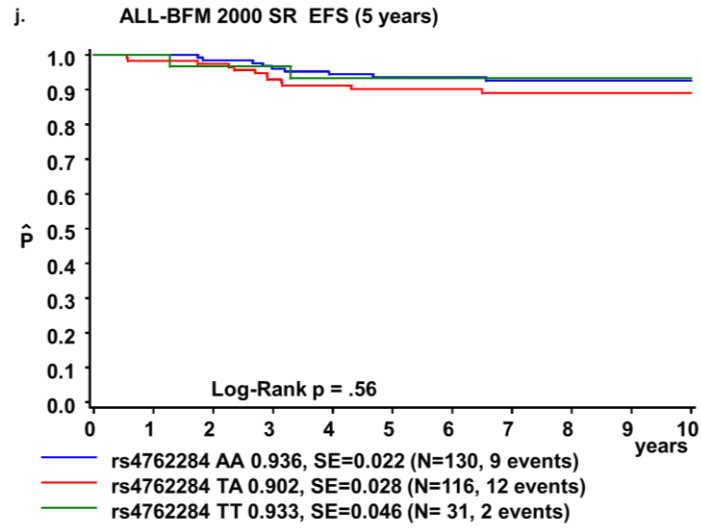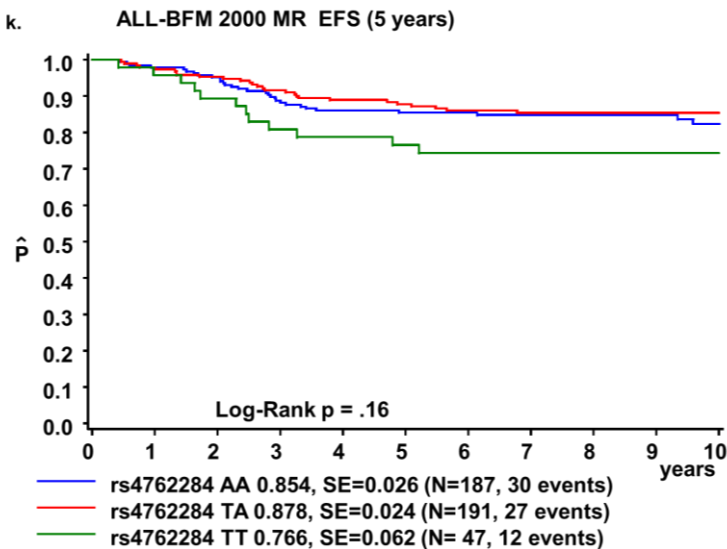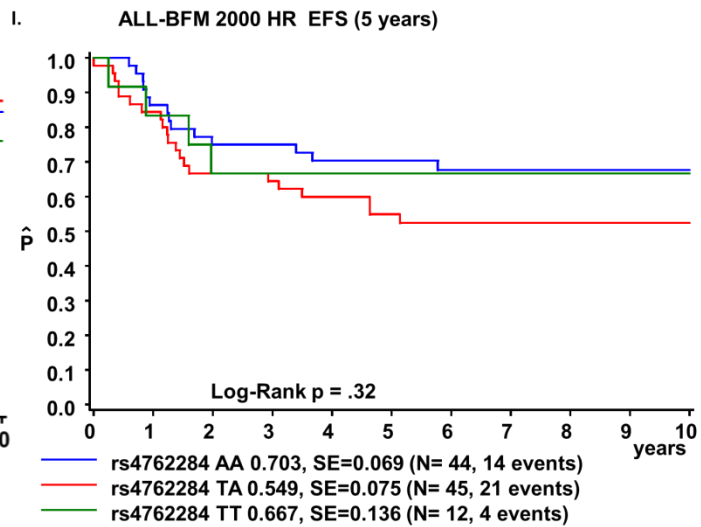

**Figure S4: Kaplan-Meier curves of patient survivorship in BCP-ALL patients.** (a-f) Stratified by rs35837782 (10p14) and rs4762284 (g-l) genotype. EFS: Event Free Survivorship; SR: standard risk; HR: higher risk; MR: medium risk; CI: cumulative incidence.

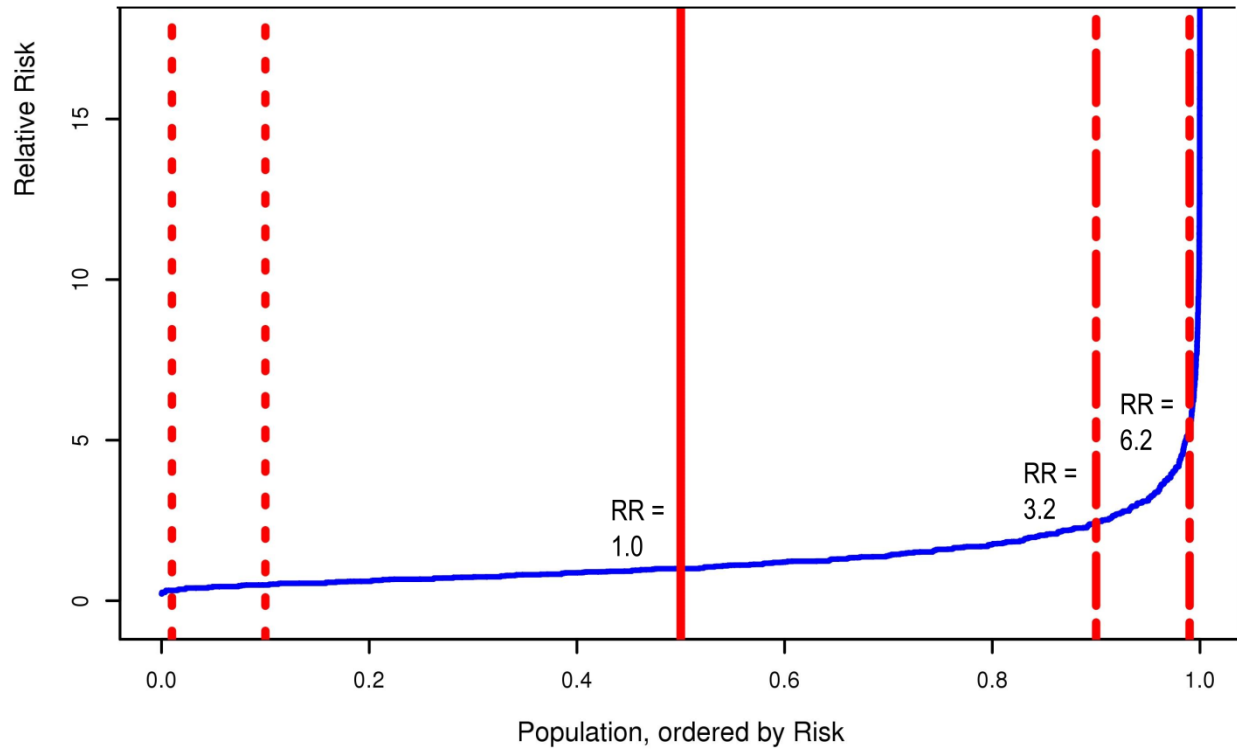

**Figure S5: Population distribution of childhood ALL relative risk scores ordered by genetic risk (risk is relative to population median risk).** The blue line plots the distribution of RR across the population; the red lines correspond to 1st, 10th, 50th, 90th and 99th centiles. The RR figures presented in black are the average in the (i) highest 10 and (ii) top 1 centile of genetic risk.



|                        |           |                  |          |          |                              |                              |                 |             |           | UK series   |             |             |                              | German series |             |             |                              |              |
|------------------------|-----------|------------------|----------|----------|------------------------------|------------------------------|-----------------|-------------|-----------|-------------|-------------|-------------|------------------------------|---------------|-------------|-------------|------------------------------|--------------|
|                        |           |                  |          |          |                              |                              |                 |             |           | RAF         |             |             |                              | RAF           |             |             |                              |              |
| SNP                    | Chr       | Position         | A1       | A2       | $P^a$                        | $P^b$                        | OR <sup>c</sup> | Q           | I2        | INFO        | Case        | Control     | P value                      | INFO          | Case        | Control     | P value                      | Gene/Feature |
| rs12751998             | 1         | 57193872         | T        | G        | 3.26X10 <sup>-07</sup>       | 3.26X10 <sup>-07</sup>       | 1.97            | 0.32        | 0         | 0.96        | 0.04        | 0.02        | 3.48X10 <sup>-06</sup>       | 0.97          | 0.03        | 0.02        | 1.84X10 <sup>-02</sup>       | C1orf168     |
| rs1869595              | 1         | 110746260        | G        | A        | 3.88X10 <sup>-05</sup>       | 3.88X10 <sup>-05</sup>       | 0.85            | 0.63        | 0         | 1           | 0.47        | 0.51        | 4.88X10 <sup>-04</sup>       | 0.97          | 0.46        | 0.5         | 2.53X10 <sup>-02</sup>       | Intergenic   |
| rs890579               | 2         | 179263287        | C        | T        | 5.41X10 <sup>-05</sup>       | 5.41X10 <sup>-05</sup>       | 0.85            | 0.98        | 0         | 0.99        | 0.37        | 0.41        | 1.79X10 <sup>-03</sup>       | 1             | 0.37        | 0.4         | 1.05X10 <sup>-02</sup>       | OSBPL6       |
| rs74952692             | 3         | 162926039        | C        | T        | 3.23X10 <sup>-05</sup>       | 3.23X10 <sup>-05</sup>       | 1.4             | 0.45        | 0         | 0.99        | 0.09        | 0.06        | 2.22X10 <sup>-04</sup>       | 1             | 0.08        | 0.06        | 4.01X10 <sup>-02</sup>       | LINC1192     |
| rs16852911             | 4         | 41205654         | A        | T        | 2.03X10 <sup>-05</sup>       | 2.03X10 <sup>-05</sup>       | 1.48            | 0.97        | 0         | 0.99        | 0.06        | 0.05        | 1.46X10 <sup>-03</sup>       | 1             | 0.06        | 0.05        | 4.59X10 <sup>-03</sup>       | APBB2        |
| rs145666495            | 4         | 186977423        | G        | T        | 6.75X10 <sup>-07</sup>       | 6.75X10 <sup>-07</sup>       | 2.54            | 0.38        | 0         | 0.81        | 0.03        | 0.02        | 2.38X10 <sup>-04</sup>       | 0.74          | 0.02        | 0.01        | 5.48X10 <sup>-04</sup>       | Intergenic   |
| rs3748079              | 6         | 33588147         | C        | T        | 5.05X10 <sup>-05</sup>       | 5.05X10 <sup>-05</sup>       | 1.22            | 0.61        | 0         | 1           | 0.22        | 0.2         | 7.88X10 <sup>-03</sup>       | 1             | 0.28        | 0.24        | 1.91X10 <sup>-03</sup>       | Intergenic   |
| rs6933843 <sup>#</sup> | 6         | 129551759        | T        | G        | 1.08X10 <sup>-05</sup>       | 1.08X10 <sup>-05</sup>       | 2.18            | 0.58        | 0         | 0.9         | 0.03        | 0.02        | 1.27X10 <sup>-04</sup>       | 0.97          | 0.02        | 0.01        | 2.55X10 <sup>-02</sup>       | LAMA2        |
| rs3750131              | 7         | 156754981        | T        | C        | 7.43X10 <sup>-06</sup>       | 7.43X10 <sup>-06</sup>       | 1.25            | 0.83        | 0         | 1           | 0.25        | 0.21        | 3.39X10 <sup>-04</sup>       | 1             | 0.23        | 0.2         | 6.96X10 <sup>-03</sup>       | NOM1         |
| rs3935421              | 8         | 130203139        | A        | G        | 6.51X10 <sup>-05</sup>       | 6.51X10 <sup>-05</sup>       | 1.28            | 0.86        | 0         | 1           | 0.14        | 0.12        | 1.99X10 <sup>-03</sup>       | 0.98          | 0.16        | 0.12        | 1.13X10 <sup>-02</sup>       | Intergenic   |
| rs62579834             | 9         | 83747824         | C        | A        | 2.54X10 <sup>-06</sup>       | 2.54X10 <sup>-06</sup>       | 0.58            | 0.7         | 0         | 0.94        | 0.02        | 0.03        | 1.39X10 <sup>-04</sup>       | 0.95          | 0.02        | 0.04        | 5.29X10 <sup>-03</sup>       | Intergenic   |
| <b>rs35837782*</b>     | <b>10</b> | <b>126293309</b> | <b>A</b> | <b>G</b> | <b>5.96X10<sup>-07</sup></b> | <b>5.96X10<sup>-07</sup></b> | <b>1.24</b>     | <b>0.5</b>  | <b>0</b>  | <b>0.98</b> | <b>0.33</b> | <b>0.38</b> | <b>2.04X10<sup>-05</sup></b> | <b>0.98</b>   | <b>0.33</b> | <b>0.37</b> | <b>7.19X10<sup>-03</sup></b> | <b>LHPP</b>  |
| rs16937230             | 11        | 8264350          | T        | C        | 1.30X10 <sup>-05</sup>       | 8.36X10 <sup>-05</sup>       | 0.66            | 0.27        | 17        | 0.91        | 0.03        | 0.06        | 5.43X10 <sup>-05</sup>       | 1             | 0.04        | 0.05        | 4.75X10 <sup>-02</sup>       | LMO1         |
| rs1001205              | 11        | 119292712        | T        | C        | 7.48X10 <sup>-05</sup>       | 7.48X10 <sup>-05</sup>       | 1.18            | 0.8         | 0         | 0.99        | 0.38        | 0.41        | 4.26X10 <sup>-03</sup>       | 1             | 0.38        | 0.43        | 5.90X10 <sup>-03</sup>       | THY1         |
| rs1419981              | 12        | 7756706          | A        | G        | 5.55X10 <sup>-05</sup>       | 5.55X10 <sup>-05</sup>       | 1.38            | 0.36        | 0         | 0.98        | 0.08        | 0.06        | 3.56X10 <sup>-04</sup>       | 1             | 0.09        | 0.07        | 3.73X10 <sup>-02</sup>       | Intergenic   |
| <b>rs4762284*</b>      | <b>12</b> | <b>96612762</b>  | <b>A</b> | <b>T</b> | <b>2.90X10<sup>-06</sup></b> | <b>2.69X10<sup>-05</sup></b> | <b>1.23</b>     | <b>0.26</b> | <b>20</b> | <b>0.98</b> | <b>0.33</b> | <b>0.3</b>  | <b>4.63X10<sup>-03</sup></b> | <b>0.97</b>   | <b>0.33</b> | <b>0.28</b> | <b>1.01X10<sup>-04</sup></b> | <b>ELK3</b>  |
| rs7152152              | 14        | 68906285         | C        | T        | 1.87X10 <sup>-05</sup>       | 2.18X10 <sup>-03</sup>       | 0.82            | 0.16        | 51        | 0.99        | 0.28        | 0.26        | 1.80X10 <sup>-02</sup>       | 1             | 0.29        | 0.24        | 1.23X10 <sup>-04</sup>       | RAD51B       |
| rs10148274             | 14        | 94087775         | C        | A        | 5.86X10 <sup>-05</sup>       | 5.86X10 <sup>-05</sup>       | 0.83            | 0.39        | 0         | 0.95        | 0.32        | 0.3         | 1.23X10 <sup>-02</sup>       | 1             | 0.32        | 0.27        | 1.12X10 <sup>-03</sup>       | UNC79        |
| rs4448919              | 15        | 98663026         | G        | A        | 9.01X10 <sup>-07</sup>       | 9.01X10 <sup>-07</sup>       | 1.23            | 0.9         | 0         | 0.97        | 0.47        | 0.42        | 1.36X10 <sup>-04</sup>       | 0.97          | 0.48        | 0.44        | 1.96X10 <sup>-03</sup>       | Intergenic   |
| rs10411772             | 19        | 54048951         | A        | C        | 8.71X10 <sup>-06</sup>       | 8.02X10 <sup>-04</sup>       | 1.44            | 0.18        | 45        | 0.89        | 0.09        | 0.07        | 1.20X10 <sup>-02</sup>       | 1             | 0.08        | 0.05        | 9.30X10 <sup>-05</sup>       | ZNF331       |

**Table S1: Summary statistics for novel variants showing an association with BCP-ALL risk in the GWAS meta-analysis after QC.** a: Shown are discovery association P values for individual studies and from meta-analysis of GWAS datasets. a.  $P$ -values under a fixed effects model. b.  $P$ -values under a random effects model c:OR Odds ratios derived with respect to the risk allele.RAF: risk allele frequency in discovery cases. \*SNPs which were genome-wide significant after replication genotyping.<sup>#</sup> rs6933843 was used a proxy to rs6569588 which was the top ranking SNP in that candidate loci.

| SNP                           | Alleles | Concordance | r <sup>2</sup> |
|-------------------------------|---------|-------------|----------------|
| rs1001205                     | AA      | 54/54       | 1.0            |
|                               | Aa      | 76/76       |                |
|                               | aa      | 16/16       |                |
| rs890579                      | AA      | 52/52       | 1.0            |
|                               | Aa      | 69/69       |                |
|                               | aa      | 27/27       |                |
| rs1419881                     | AA      | 117/118     | 0.999          |
|                               | Aa      | 22/24       |                |
|                               | Aa      | 2/2         |                |
| <b>rs4762284<sup>a</sup></b>  | AA      | 78/78       | 1.0            |
|                               | Aa      | 51/51       |                |
|                               | aa      | 17/17       |                |
| rs6933843                     | AA      | 0/0         | 1.0            |
|                               | Aa      | 5/5         |                |
|                               | aa      | 139/139     |                |
| rs10148274                    | AA      | 64/65       | 0.999          |
|                               | Aa      | 56/59       |                |
|                               | Aa      | 12/12       |                |
| rs1041172                     | AA      | 116/116     | 0.999          |
|                               | Aa      | 19/20       |                |
|                               | aa      | 0/0         |                |
| rs16937230                    | AA      | 0/0         | 0.999          |
|                               | Aa      | 10/12       |                |
|                               | aa      | 134/135     |                |
| <b>rs35837782<sup>a</sup></b> | AA      | 17/18       | 0.999          |
|                               | Aa      | 62/62       |                |
|                               | Aa      | 63/64       |                |
| rs74952692                    | AA      | 126/126     | 1.0            |
|                               | Aa      | 22/22       |                |
|                               | Aa      | 0/0         |                |
| rs16852911                    | AA      | 134/134     | 0.999          |
|                               | Aa      | 12/13       |                |
|                               | aa      | 2/2         |                |
| rs12751998                    | AA      | 0/0         | 1.0            |
|                               | Aa      | 10/10       |                |
|                               | aa      | 137/137     |                |
| rs4448919                     | AA      | 34/35       | 0.999          |
|                               | Aa      | 67/68       |                |
|                               | Aa      | 34/36       |                |
| rs145666495                   | AA      | 141/142     | 1.0            |
|                               | Aa      | 5/5         |                |
|                               | aa      | 0/0         |                |
| rs7152152                     | AA      | 11/11       | 0.999          |
|                               | Aa      | 54/55       |                |
|                               | Aa      | 80/80       |                |
| rs62579834                    | AA      | 1/1         | 1.0            |
|                               | Aa      | 3/3         |                |
|                               | Aa      | 144/144     |                |

**Table S2: Imputation quality scores and concordance between directly sequenced and imputed genotype. (a) SNPs which were genome-wide significant after replication.** AA, major homozygote; AB, heterozygote; BB, minor homozygote; Is, Information score giving an indication of imputation quality. r<sup>2</sup> indicates Pearson product-moment correlation coefficient between imputed and sequenced genotype.

| UK Replication 1  |           |                  | Cases    |          |            |            |            |             | Controls   |            |            |             |             |
|-------------------|-----------|------------------|----------|----------|------------|------------|------------|-------------|------------|------------|------------|-------------|-------------|
| SNP               | CHR       | POS              | A1       | A2       | AA         | AB         | BB         | RAF         | AA         | AB         | BB         | RAF         | P-value     |
| rs12751998        | 1         | 57193872         | T        | G        | 0          | 22         | 351        | 0.97        | 1          | 59         | 961        | 0.97        | 0.77        |
| rs1869595         | 1         | 110746260        | G        | A        | 139        | 250        | 148        | 0.51        | 266        | 514        | 256        | 0.50        | 0.49        |
| rs890579          | 2         | 179263287        | C        | T        | 171        | 244        | 115        | 0.45        | 379        | 489        | 149        | 0.39        | 0.001       |
| rs16852911        | 4         | 41205654         | A        | T        | 3          | 61         | 478        | 0.94        | 0          | 95         | 952        | 0.95        | 0.06        |
| rs3748079         | 6         | 33588147         | C        | T        | 321        | 185        | 31         | 0.23        | 653        | 328        | 36         | 0.20        | 0.03        |
| rs3750131         | 7         | 156754981        | T        | C        | 26         | 186        | 332        | 0.78        | 50         | 323        | 631        | 0.79        | 0.60        |
| rs62579834        | 9         | 83747824         | C        | A        | 0          | 25         | 517        | 0.98        | 3          | 81         | 939        | 0.96        | 0.02        |
| <b>rs35837782</b> | <b>10</b> | <b>126293309</b> | <b>A</b> | <b>G</b> | <b>73</b>  | <b>211</b> | <b>251</b> | <b>0.67</b> | <b>150</b> | <b>475</b> | <b>405</b> | <b>0.62</b> | <b>0.02</b> |
| rs1001205         | 11        | 119292712        | T        | C        | 210        | 246        | 81         | 0.38        | 350        | 496        | 175        | 0.41        | 0.06        |
| <b>rs4762284</b>  | <b>12</b> | <b>96612762</b>  | <b>A</b> | <b>T</b> | <b>258</b> | <b>227</b> | <b>52</b>  | <b>0.31</b> | <b>497</b> | <b>408</b> | <b>98</b>  | <b>0.30</b> | <b>0.69</b> |
| rs7152152         | 14        | 68906285         | C        | T        | 31         | 210        | 294        | 0.75        | 69         | 359        | 591        | 0.76        | 0.53        |
| rs10148274        | 14        | 94087775         | C        | A        | 245        | 232        | 60         | 0.33        | 494        | 424        | 94         | 0.30        | 0.15        |
| rs4448919         | 15        | 98663026         | G        | A        | 120        | 268        | 148        | 0.53        | 184        | 504        | 325        | 0.57        | 0.02        |
| rs10411772        | 19        | 54048951         | A        | C        | 448        | 80         | 7          | 0.09        | 880        | 141        | 2          | 0.07        | 0.09        |

| German Replication |           |                  | Cases    |          |            |            |            |             | Controls   |            |            |             |             |
|--------------------|-----------|------------------|----------|----------|------------|------------|------------|-------------|------------|------------|------------|-------------|-------------|
| SNP                | CHR       | POS              | A1       | A2       | AA         | AB         | BB         | RAF         | AA         | AB         | BB         | RAF         | P-value     |
| rs12751998         | 1         | 57193872         | T        | G        | 3          | 70         | 1315       | 0.97        | 2          | 61         | 1424       | 0.98        | 0.19        |
| rs1869595          | 1         | 110746260        | G        | A        | 345        | 703        | 428        | 0.53        | 315        | 704        | 461        | 0.55        | 0.11        |
| rs890579           | 2         | 179263287        | C        | T        | 208        | 667        | 527        | 0.61        | 236        | 718        | 524        | 0.60        | 0.20        |
| rs16852911         | 4         | 41205654         | A        | T        | 1229       | 151        | 6          | 0.06        | 1351       | 131        | 7          | 0.05        | 0.10        |
| rs3748079          | 6         | 33588147         | C        | T        | 746        | 540        | 113        | 0.27        | 821        | 590        | 83         | 0.25        | 0.07        |
| rs3750131          | 7         | 156754981        | T        | C        | 87         | 494        | 806        | 0.76        | 62         | 498        | 919        | 0.79        | 0.01        |
| rs62579834         | 9         | 83747824         | C        | A        | 1          | 90         | 1308       | 0.97        | 3          | 98         | 1386       | 0.97        | 0.66        |
| <b>rs35837782</b>  | <b>10</b> | <b>126293309</b> | <b>A</b> | <b>G</b> | <b>184</b> | <b>607</b> | <b>621</b> | <b>0.65</b> | <b>204</b> | <b>701</b> | <b>574</b> | <b>0.63</b> | <b>0.02</b> |
| rs1001205          | 11        | 119292712        | T        | C        | 533        | 660        | 207        | 0.38        | 543        | 708        | 235        | 0.40        | 0.32        |
| <b>rs4762284</b>   | <b>12</b> | <b>96612762</b>  | <b>A</b> | <b>T</b> | <b>650</b> | <b>625</b> | <b>124</b> | <b>0.31</b> | <b>746</b> | <b>619</b> | <b>109</b> | <b>0.28</b> | <b>0.02</b> |
| rs7152152          | 14        | 68906285         | C        | T        | 118        | 525        | 757        | 0.73        | 112        | 549        | 818        | 0.74        | 0.38        |
| rs10148274         | 14        | 94087775         | C        | A        | 666        | 587        | 138        | 0.31        | 752        | 593        | 140        | 0.29        | 0.19        |
| rs4448919          | 15        | 98663026         | G        | A        | 302        | 647        | 434        | 0.55        | 296        | 749        | 412        | 0.54        | 0.55        |
| rs10411772         | 19        | 54048951         | A        | C        | 1197       | 187        | 9          | 0.07        | 1288       | 192        | 7          | 0.07        | 0.53        |

| UK Replication 2  |           |                  | Cases    |          |            |            |            |             | Controls   |            |            |             | P-value       |
|-------------------|-----------|------------------|----------|----------|------------|------------|------------|-------------|------------|------------|------------|-------------|---------------|
| SNP               | CHR       | POS              | A1       | A2       | AA         | AB         | BB         | RAF         | AA         | AB         | BB         | RAF         |               |
| rs890579          | 2         | 179263287        | C        | T        | 188        | 274        | 112        | 0.43        | 401        | 515        | 140        | 0.38        | 0.001         |
| rs3748079         | 6         | 33588147         | C        | T        | 358        | 197        | 20         | 0.21        | 665        | 350        | 45         | 0.21        | 0.92          |
| rs3750131         | 7         | 156754981        | T        | C        | 26         | 185        | 364        | 0.79        | 39         | 343        | 678        | 0.80        | 0.61          |
| <b>rs35837782</b> | <b>10</b> | <b>126293309</b> | <b>A</b> | <b>G</b> | <b>56</b>  | <b>265</b> | <b>253</b> | <b>0.67</b> | <b>167</b> | <b>497</b> | <b>391</b> | <b>0.61</b> | <b>0.0002</b> |
| <b>rs4762284</b>  | <b>12</b> | <b>96612762</b>  | <b>A</b> | <b>T</b> | <b>232</b> | <b>287</b> | <b>52</b>  | <b>0.34</b> | <b>534</b> | <b>434</b> | <b>85</b>  | <b>0.29</b> | <b>0.0008</b> |

**Table S3: Replication series for BCP-ALL GWAS.** Candidate SNPs genotyped in UK Replication 1 and German Replication series, SNPs nominally significant (i.e.  $P < 0.05$ ) in both series combined were genotyped in a third UK Replication series 2 to identify novel risk factors. CHR: Chromosome, POS: Position in Hg19 build, A1/A2: Alleles, P-value obtained under a logistic regression model.

| <b>Hyperdiploid</b>                          | <b>Case genotypes</b>     |            |            |            |              | <b>Control genotypes</b> |             |             |             |              | <b>OR<sup>b</sup></b> | <b>95% CI<sup>c</sup></b>                                     | <b>P-value</b>              |
|----------------------------------------------|---------------------------|------------|------------|------------|--------------|--------------------------|-------------|-------------|-------------|--------------|-----------------------|---------------------------------------------------------------|-----------------------------|
|                                              | <b>RAF<sup>2</sup>(G)</b> | <b>AA</b>  | <b>AG</b>  | <b>GG</b>  | <b>Total</b> | <b>RAF(G)</b>            | <b>AA</b>   | <b>AG</b>   | <b>GG</b>   | <b>Total</b> |                       |                                                               |                             |
| <b>rs35837782</b><br><b>(10q26.13, LHPP)</b> |                           |            |            |            |              |                          |             |             |             |              |                       |                                                               |                             |
| UK GWAS                                      | 0.67                      | 31         | 128        | 129        | 289          | 0.62                     | 745         | 2510        | 1945        | 5200         | 1.28                  | (1.07-1.53)                                                   | 0.007                       |
| German GWAS                                  | 0.67                      | 15         | 87         | 74         | 176          | 0.63                     | 268         | 952         | 804         | 2024         | 1.17                  | (0.93-1.48)                                                   | 0.147                       |
| German replication                           | 0.65                      | 32         | 97         | 101        | 230          | 0.63                     | 204         | 701         | 574         | 1479         | 1.11                  | (0.91-1.37)                                                   | 0.304                       |
| UK replication 1                             | 0.7                       | 22         | 62         | 95         | 179          | 0.62                     | 150         | 475         | 405         | 1030         | 1.42                  | (1.11-1.80)                                                   | 0.005                       |
| UK replication 2                             | 0.67                      | 18         | 84         | 80         | 182          | 0.61                     | 167         | 500         | 395         | 1062         | 1.31                  | (1.04-1.66)                                                   | 0.023                       |
| <b>Combined</b>                              | <b>0.67</b>               | <b>118</b> | <b>459</b> | <b>479</b> | <b>1056</b>  | <b>0.62</b>              | <b>1534</b> | <b>5139</b> | <b>4123</b> | <b>10795</b> | <b>1.25</b>           | <b>(1.13-1.37)</b>                                            | <b>6.79X10<sup>-6</sup></b> |
|                                              |                           |            |            |            |              |                          |             |             |             |              |                       | ( <i>P</i> <sub>het</sub> = 0.60, <i>I</i> <sup>2</sup> = 0%) |                             |
| <b>rs4762284</b><br><b>(12q23.1, ELK3)</b>   |                           |            |            |            |              |                          |             |             |             |              |                       |                                                               |                             |
| UK GWAS                                      | 0.35                      | 121        | 134        | 34         | 289          | 0.3                      | 2578        | 2160        | 462         | 5200         | 1.27                  | (1.07-1.52)                                                   | 0.006                       |
| German GWAS                                  | 0.32                      | 82         | 75         | 19         | 176          | 0.28                     | 1072        | 773         | 179         | 2024         | 1.21                  | (0.96-1.52)                                                   | 0.084                       |
| German replication                           | 0.32                      | 100        | 109        | 18         | 227          | 0.28                     | 746         | 619         | 109         | 1474         | 1.19                  | (0.96-1.48)                                                   | 0.113                       |
| UK replication 1                             | 0.3                       | 88         | 75         | 17         | 180          | 0.3                      | 497         | 408         | 98          | 1003         | 1.01                  | (0.79-1.28)                                                   | 0.95                        |
| UK replication 2                             | 0.32                      | 76         | 96         | 10         | 182          | 0.29                     | 534         | 434         | 85          | 1053         | 1.16                  | (0.94-1.48)                                                   | 0.208                       |
| <b>Combined</b>                              | <b>0.33</b>               | <b>466</b> | <b>489</b> | <b>98</b>  | <b>1054</b>  | <b>0.29</b>              | <b>5428</b> | <b>4394</b> | <b>932</b>  | <b>10754</b> | <b>1.18</b>           | <b>(1.07-1.30)</b>                                            | <b>7.24X10<sup>-4</sup></b> |
|                                              |                           |            |            |            |              |                          |             |             |             |              |                       | ( <i>P</i> <sub>het</sub> = 0.66, <i>I</i> <sup>2</sup> = 0%) |                             |
| <b>ETV6/RUNX1</b>                            |                           |            |            |            |              |                          |             |             |             |              |                       |                                                               |                             |
| <b>rs35837782</b><br><b>(10q26.13, LHPP)</b> | <b>Case genotypes</b>     |            |            |            |              | <b>Control genotypes</b> |             |             |             |              | <b>OR<sup>b</sup></b> | <b>95% CI<sup>c</sup></b>                                     | <b>P-value</b>              |
|                                              | <b>RAF<sup>2</sup>(G)</b> | <b>AA</b>  | <b>AG</b>  | <b>GG</b>  | <b>Total</b> | <b>RAF(G)</b>            | <b>AA</b>   | <b>AG</b>   | <b>GG</b>   | <b>Total</b> |                       |                                                               |                             |
| UK GWAS                                      | 0.64                      | 17         | 58         | 51         | 126          | 0.62                     | 745         | 2510        | 1945        | 5200         | 1.09                  | (0.84-1.41)                                                   | 0.498                       |
| German GWAS                                  | 0.63                      | 9          | 28         | 26         | 63           | 0.63                     | 268         | 952         | 804         | 2024         | 1.01                  | (0.70-1.46)                                                   | 0.842                       |
| German replication                           | 0.67                      | 36         | 150        | 153        | 339          | 0.63                     | 204         | 701         | 574         | 1479         | 1.23                  | (1.03-1.47)                                                   | 0.02                        |
| UK replication 1                             | 0.67                      | 16         | 62         | 63         | 141          | 0.62                     | 150         | 475         | 405         | 1030         | 1.20                  | (0.93-1.56)                                                   | 0.166                       |
| UK replication 2                             | 0.62                      | 24         | 66         | 61         | 151          | 0.61                     | 167         | 500         | 395         | 1062         | 1.06                  | (0.83-1.36)                                                   | 0.617                       |
| <b>Combined</b>                              | <b>0.65</b>               | <b>102</b> | <b>365</b> | <b>354</b> | <b>820</b>   | <b>0.62</b>              | <b>1534</b> | <b>5139</b> | <b>4123</b> | <b>10795</b> | <b>1.15</b>           | <b>(1.03-1.28)</b>                                            | <b>0.01</b>                 |
|                                              |                           |            |            |            |              |                          |             |             |             |              |                       | ( <i>P</i> <sub>het</sub> = 0.76, <i>I</i> <sup>2</sup> = 0%) |                             |

| rs4762284<br>(12q23.1,ELK3)                           | Case genotypes |            |            |           |            | Control genotypes |             |             |            |              | OR          | 95% CI             | P-value     |
|-------------------------------------------------------|----------------|------------|------------|-----------|------------|-------------------|-------------|-------------|------------|--------------|-------------|--------------------|-------------|
|                                                       | RAF(T)         | AA         | AT         | TT        | Total      | RAF(T)            | AA          | AT          | TT         | Total        |             |                    |             |
| UK GWAS                                               | 0.32           | 60         | 53         | 13        | 126        | 0.3               | 2578        | 2160        | 462        | 5200         | 1.08        | (0.83-1.42)        | 0.520       |
| German GWAS                                           | 0.3            | 33         | 22         | 8         | 63         | 0.28              | 1072        | 773         | 179        | 2024         | 1.11        | (0.76-1.61)        | 0.624       |
| German replication                                    | 0.29           | 169        | 137        | 30        | 336        | 0.28              | 746         | 619         | 109        | 1474         | 0.97        | (0.80-1.16)        | 0.628       |
| UK replication 1                                      | 0.31           | 68         | 61         | 14        | 143        | 0.3               | 497         | 408         | 98         | 1003         | 1.12        | (0.85-1.46)        | 0.732       |
| UK replication 2                                      | 0.36           | 58         | 75         | 17        | 150        | 0.29              | 534         | 434         | 85         | 1053         | 1.46        | (1.13-1.88)        | 0.007       |
| <b>Combined</b>                                       | <b>0.31</b>    | <b>388</b> | <b>348</b> | <b>82</b> | <b>818</b> | <b>0.29</b>       | <b>5428</b> | <b>4394</b> | <b>932</b> | <b>10754</b> | <b>1.12</b> | <b>(1.00-1.26)</b> | <b>0.05</b> |
| <i>(P<sub>het</sub> = 0.40, I<sup>2</sup> = 1.5%)</i> |                |            |            |           |            |                   |             |             |            |              |             |                    |             |

  

| Non-hyperdiploid/<br>ETV6/RUNX1                      | Case genotypes       |            |            |             |             | Control genotypes |             |             |             |              | OR <sup>b</sup> | 95% CI <sup>c</sup> | P-value                     |
|------------------------------------------------------|----------------------|------------|------------|-------------|-------------|-------------------|-------------|-------------|-------------|--------------|-----------------|---------------------|-----------------------------|
|                                                      | RAF <sup>a</sup> (G) | AA         | AG         | GG          | Total       | RAF(G)            | AA          | AG          | GG          | Total        |                 |                     |                             |
| rs35837782<br>(10q26.13, LHPP)                       | 0.68                 | 46         | 171        | 192         | 409         | 0.62              | 745         | 2510        | 1945        | 5200         | 1.32            | (1.14-1.54)         | 2.43x10 <sup>-4</sup>       |
| German GWAS                                          | 0.67                 | 69         | 253        | 277         | 599         | 0.63              | 268         | 952         | 804         | 2024         | 1.04            | (0.90-1.20)         | 0.009                       |
| German replication                                   | 0.65                 | 113        | 340        | 348         | 801         | 0.63              | 204         | 701         | 574         | 1479         | 1.1             | (0.97-1.24)         | 0.152                       |
| UK replication 1                                     | 0.63                 | 35         | 87         | 93          | 215         | 0.62              | 150         | 475         | 405         | 1030         | 1.05            | (0.85-1.29)         | 0.671                       |
| UK replication 2                                     | 0.7                  | 14         | 115        | 112         | 241         | 0.61              | 167         | 500         | 395         | 1062         | 1.54            | (1.24-1.91)         | 8.85E-05                    |
| <b>Combined</b>                                      | <b>0.66</b>          | <b>276</b> | <b>966</b> | <b>1022</b> | <b>2265</b> | <b>0.62</b>       | <b>1534</b> | <b>5139</b> | <b>4123</b> | <b>10795</b> | <b>1.16</b>     | <b>(1.08-1.25)</b>  | <b>2.91X10<sup>-5</sup></b> |
| <i>(P<sub>het</sub> = 0.01, I<sup>2</sup> = 70%)</i> |                      |            |            |             |             |                   |             |             |             |              |                 |                     |                             |

  

| rs4762284<br>(12q23.1,ELK3)                          | Case genotypes |             |             |            |             | Control genotypes |             |             |            |              | OR          | 95% CI             | P-value                     |
|------------------------------------------------------|----------------|-------------|-------------|------------|-------------|-------------------|-------------|-------------|------------|--------------|-------------|--------------------|-----------------------------|
|                                                      | RAF(T)         | AA          | AT          | TT         | Total       | RAF(T)            | AA          | AT          | TT         | Total        |             |                    |                             |
| UK GWAS                                              | 0.32           | 192         | 171         | 46         | 409         | 0.3               | 2578        | 2160        | 462        | 5200         | 1.12        | (0.96-1.31)        | 0.125                       |
| German GWAS                                          | 0.34           | 260         | 271         | 68         | 599         | 0.28              | 1072        | 773         | 179        | 2024         | 1.31        | (1.15-1.50)        | 1.46X10 <sup>-4</sup>       |
| German replication                                   | 0.32           | 353         | 366         | 74         | 793         | 0.28              | 746         | 619         | 109        | 1474         | 1.22        | (1.06-1.40)        | 0.004                       |
| UK replication 1                                     | 0.31           | 102         | 91          | 21         | 214         | 0.3               | 497         | 408         | 98         | 1003         | 1.05        | (1.04-1.31)        | 0.697                       |
| UK replication 2                                     | 0.35           | 98          | 116         | 25         | 239         | 0.29              | 534         | 434         | 85         | 1053         | 1.32        | (1.07-1.63)        | 0.009                       |
| <b>Combined</b>                                      | <b>0.33</b>    | <b>1005</b> | <b>1015</b> | <b>234</b> | <b>2254</b> | <b>0.29</b>       | <b>5428</b> | <b>4394</b> | <b>932</b> | <b>10754</b> | <b>1.21</b> | <b>(1.13-1.30)</b> | <b>1.16X10<sup>-7</sup></b> |
| <i>(P<sub>het</sub> = 0.33, I<sup>2</sup> = 14%)</i> |                |             |             |            |             |                   |             |             |            |              |             |                    |                             |

**Table S4: Relationship between SNP genotype and ALL subtype.** RAF: Risk Allele Frequency, OR: Odds Ratio, P-value obtained from logistic regression.

| SNP        | Discovery <i>P</i> -values* | <i>P</i> -values conditional on: |                        |            |
|------------|-----------------------------|----------------------------------|------------------------|------------|
|            |                             | rs3731217                        | rs3731249              | rs77728904 |
| rs3731217  | 1.52x10 <sup>-08</sup>      | -                                | 6.24x10 <sup>-08</sup> | 4.18E-08   |
| rs3731249* | 6.03x10 <sup>-16</sup>      | 1.54x10 <sup>-12</sup>           | -                      | 3.82E-09   |
| rs77728904 | 6.26x10 <sup>-07</sup>      | 3.74x10 <sup>-05</sup>           | 0.10                   | -          |

**Table S5: Conditional analysis of SNPs significant in 9p21.3 region and newly claimed independent SNP rs77728904.** *P*-values obtained from a meta-analysis of B cell ALL UK and German GWAS series after imputation with UK10k and 1KG reference panels. rs3731249 is the recently described low frequency variant by Vijayakrishnan *et al.* *P*-values\* obtained through meta-analysis under a fixed model.

|                   | Study              | Controls<br>RAF <sup>a</sup> | Hyperdiploid*<br>(n,RAF) | t(12:21)*<br>(n,RAF) | t(1;19)*<br>(n,RAF) | t(9;22)*<br>(n,RAF) | t(4;11)<br>(n,RAF) | CDKN2A deletion <sup>§</sup><br>(n,RAF) |
|-------------------|--------------------|------------------------------|--------------------------|----------------------|---------------------|---------------------|--------------------|-----------------------------------------|
| <b>rs35837782</b> | UKGWAS             | 0.62                         | 0.97 (289, 0.67)         | 0.29 (126, 0.64)     | 0.54 (5, 0.70)      | 0.87 (7, 0.79)      | 0.40 (2, 0.75)     | 0                                       |
|                   | German GWAS        | 0.63                         | 0.91 (176, 0.67)         | 0.35 (63, 0.63)      | 0.53 (5, 0.90)      | 0.28 (20, 0.70)     | 0.66 (4, 0.75)     | 0                                       |
|                   | German replication | 0.63                         | 0.94 (230, 0.65)         | 0.24 (339, 0.67)     | 0.17 (31, 0.56)     | 0.34 (39, 0.67)     | 0.26 (12, 0.54)    | 0                                       |
|                   | UK Replication 1   | 0.62                         | 0.08 (179, 0.70)         | 0.84 (141, 0.67)     | 0.50 (15, 0.60)     | 0.96 (9, 0.67)      | 0                  | 0.73 (58, 0.66)                         |
|                   | UK Replication 2   | 0.61                         | 0.95 (182, 0.67)         | 0.03 (151, 0.62)     | 0.62 (22, 0.70)     | 0.66 (14, 0.68)     | 0                  |                                         |
|                   |                    | Combined <i>P</i> -value     |                          | 0.49                 | 0.46                | 0.32                | 0.33               | 0.16                                    |
| <b>rs4762284</b>  | UKGWAS             | 0.30                         | 0.22 (289, 0.35)         | 0.74 (126, 0.32)     | 0.50 (5, 0.30)      | 0.20 (6, 0.50)      | 0.37 (2, 0.75)     | 0                                       |
|                   | German GWAS        | 0.28                         | 0.58 (176, 0.32)         | 0.46 (63, 0.30)      | 0.99 (5, 0.20)      | 0.32 (21, 0.40)     | 0.27 (4, 0.38)     | 0                                       |
|                   | German replication | 0.28                         | 0.54 (227, 0.32)         | 0.16 (336, 0.29)     | 0.97 (31, 0.31)     | 0.21 (38, 0.27)     | 0.11 (12, 0.42)    | 0                                       |
|                   | UK Replication 1   | 0.30                         | 0.79 (180, 0.30)         | 0.92 (143, 0.31)     | 0.67 (16, 0.34)     | 0.09 (9, 0.50)      | 0                  | 0.94 (52, 0.31)                         |
|                   | UK Replication 2   | 0.29                         | 0.22 (182, 0.32)         | 0.40 (150, 0.36)     | 0.66 (20, 0.38)     | 0.15 (14, 0.46)     | 0                  |                                         |
|                   |                    | Combined <i>P</i> -value     |                          | 0.93                 | 0.39                | 0.55                | 0.20               | <b>0.03</b>                             |

**Table S6: Relationship between genotype and specific tumour karyotype.** *P*-values are given for case only analysis, along with corresponding numbers (n) and risk allele frequencies (RAF) in parenthesis. \*status for selected chromosome anomalies. <sup>§</sup>CDKN2A deletion status available for combined UK replication 1 and 2 data sets.



|                                     | Hazard ratio | 95% confidence interval |      | <i>P</i> |
|-------------------------------------|--------------|-------------------------|------|----------|
| rs35837782 genotype AA <sup>a</sup> | 0.89         | 0.49                    | 1.64 | 0.711    |
| rs35837782 genotype GG <sup>a</sup> | 1.08         | 0.74                    | 1.57 | 0.689    |
| rs4762284 genotype AA <sup>a</sup>  | 0.88         | 0.60                    | 1.29 | 0.509    |
| rs4762284 genotype TT <sup>a</sup>  | 1.24         | 0.72                    | 2.14 | 0.437    |

**Table S7. Hazard ratios for an event for rs35837782 and rs4762284 by genotype.** <sup>a</sup> in comparison to heterozygous patients.

|                                                         | Hazard ratio | 95% confidence interval |      | <i>P</i>  |
|---------------------------------------------------------|--------------|-------------------------|------|-----------|
| rs35837782 genotype AA <sup>a</sup>                     | 0.68         | 0.33                    | 1.42 | 0.301     |
| rs35837782 genotype GG <sup>a</sup>                     | 1.10         | 0.73                    | 1.68 | 0.640     |
| rs4762284 genotype AA <sup>a</sup>                      | 0.88         | 0.57                    | 1.35 | 0.555     |
| rs4762284 genotype TT <sup>a</sup>                      | 1.09         | 0.59                    | 2.04 | 0.778     |
| Age at diagnosis $\geq$ 10 years <sup>b</sup>           | 1.48         | 0.95                    | 2.31 | 0.082     |
| WBC $\geq$ 50,000 and $<$ 100,000/ $\mu$ l <sup>c</sup> | 2.61         | 1.56                    | 4.38 | $<$ 0.001 |
| WBC $\geq$ 100,000/ $\mu$ l <sup>c</sup>                | 2.08         | 1.15                    | 3.75 | 0.015     |
| <i>ETV6-RUNX1</i> -positivity <sup>d</sup>              | 0.50         | 0.16                    | 1.62 | 0.248     |
| DNA-PCR MRD standard-risk <sup>e</sup>                  | 1.92         | 1.56                    | 4.38 | 0.012     |
| DNA-PCR MRD high-risk <sup>f</sup>                      | 4.21         | 2.55                    | 6.94 | $<$ 0.001 |

<sup>a</sup> in comparison to heterozygous patients; <sup>b</sup> in comparison to patients  $<$ 10 years of age at initial diagnosis; <sup>c</sup> WBC = white blood cell count at diagnosis, in comparison to WBC $<$ 50,000/ $\mu$ l at diagnosis; <sup>d</sup> in comparison to *ETV6-RUNX1*-negatives; <sup>e</sup> in comparison to DNA-PCR MRD intermediate- and high-risk; <sup>f</sup> in comparison to DNA-PCR MRD standard- and intermediate-risk

**Table S8. Multivariate hazard ratios for an event for rs35837782 and rs4762284 by genotype.**

| CHR       | Pos (hg38)      | LD (r <sup>2</sup> ) | LD (D')  | SNP              | Promoter histone marks | Enhancer histone marks | DNase               | Proteins bound     | Motifs changed          | GENCODE genes    | dbSNP func annot | CADD scores  | GERP scores | RegulomeDB Score |
|-----------|-----------------|----------------------|----------|------------------|------------------------|------------------------|---------------------|--------------------|-------------------------|------------------|------------------|--------------|-------------|------------------|
| 12        | 96170950        | 0.24                 | -0.58    | rs2024429        |                        | 8 tissues              | HRT,MUS             |                    | 7 altered motifs        | 23kb 5' of ELK3  |                  |              |             |                  |
| 12        | 96190403        | 0.5                  | -0.85    | rs1558988        |                        | BLD                    | BLD,BLD,MUS         |                    | BCL                     | 4kb 5' of ELK3   |                  |              |             |                  |
| 12        | 96192843        | 0.71                 | 0.88     | rs7132101        | SKIN                   | 6 tissues              | 4 tissues           |                    | AP-2,HMG-IY             | 1.5kb 5' of ELK3 |                  |              |             |                  |
| 12        | 96193146        | 0.46                 | -0.91    | rs12297663       | ESDR, SKIN             | 5 tissues              | ESDR,BLD            |                    | E2F,ERalpha-a           | 1.2kb 5' of ELK3 |                  |              |             |                  |
| 12        | 96197874        | 0.5                  | -0.89    | rs7315748        | 4 tissues              | 17 tissues             | 8 tissues           | POL2               | 6 altered motifs        | ELK3             | intronic         |              |             |                  |
| 12        | 96198310        | 0.8                  | 0.96     | rs7955113        | 10 tissues             | 17 tissues             | 19 tissues          | GATA2, JUND, POL2B |                         | ELK3             | intronic         |              |             |                  |
| 12        | 96203803        | 0.82                 | 0.94     | rs2268513        |                        | 4 tissues              |                     |                    | YY1                     | ELK3             | intronic         |              |             |                  |
| 12        | 96204171        | 0.82                 | 0.94     | rs2268511        |                        | BLD, SKIN, VAS         | BRST,SKIN           |                    | 6 altered motifs        | ELK3             | intronic         |              |             |                  |
| 12        | 96206002        | 0.41                 | -0.9     | rs2268509        | BLD                    | 7 tissues              | 5 tissues           |                    |                         | ELK3             | intronic         |              |             |                  |
| 12        | 96206378        | 0.41                 | -0.9     | rs4762283        | BLD                    | 5 tissues              |                     |                    | ATF3,E2F                | ELK3             | intronic         |              |             |                  |
| 12        | 96208442        | 0.83                 | 0.99     | rs2887095        | BLD                    | 16 tissues             | 10 tissues          |                    | 4 altered motifs        | ELK3             | intronic         |              |             |                  |
| 12        | 96208965        | 0.83                 | 0.94     | rs2268508        | FAT, BLD, MUS          | 20 tissues             | 15 tissues          |                    | 6 altered motifs        | ELK3             | intronic         |              |             |                  |
| 12        | 96211206        | 0.85                 | 0.99     | rs2887096        | BLD                    | 15 tissues             | VAS,SKIN            |                    | 4 altered motifs        | ELK3             | intronic         |              |             |                  |
| 12        | 96213111        | 0.86                 | 0.99     | rs2075362        | BLD                    | 16 tissues             | 5 tissues           |                    | SRF                     | ELK3             | intronic         |              |             |                  |
| 12        | 96215566        | 0.24                 | -1       | rs17736737       | 10 tissues             | 17 tissues             | 22 tissues          | 7 bound proteins   | Crx,Obox3,Pitx2         | ELK3             | intronic         |              |             |                  |
| 12        | 96217870        | 0.93                 | 0.99     | rs12299943       |                        | 8 tissues              |                     |                    | 6 altered motifs        | ELK3             | intronic         |              |             |                  |
| 12        | 96218316        | 0.95                 | 1        | rs12828252       | LNG                    | 11 tissues             | SKIN,LNG            |                    | PLZF                    | ELK3             | intronic         |              |             |                  |
| <b>12</b> | <b>96218984</b> | <b>1</b>             | <b>1</b> | <b>rs4762284</b> | <b>SKIN</b>            | <b>9 tissues</b>       | <b>LNG,BRST,BRN</b> |                    | <b>HMG-IY,Mef2,TATA</b> | <b>ELK3</b>      | <b>intronic</b>  | <b>4.501</b> | <b>1.88</b> | <b>3a</b>        |
| 12        | 96220347        | 1                    | 1        | rs2268507        | 7 tissues              | 14 tissues             | 8 tissues           |                    | 7 altered motifs        | ELK3             | intronic         |              |             |                  |
| 12        | 96220447        | 1                    | 1        | rs2268506        | LNG                    | 15 tissues             |                     |                    | 5 altered motifs        | ELK3             | intronic         |              |             |                  |
| 12        | 96221038        | 0.6                  | -1       | rs11837546       | MUS                    | 18 tissues             | 17 tissues          |                    |                         | ELK3             | intronic         |              |             |                  |
| 12        | 96222273        | 0.85                 | 0.94     | rs1030137        |                        |                        |                     |                    |                         | ELK3             | intronic         |              |             |                  |
| 12        | 96223246        | 0.51                 | -0.84    | rs2300554        |                        | 12 tissues             | MUS,MUS,SKIN        |                    | AP-1,Pax-4              | RP11-394J1.2     | intronic         |              |             |                  |
| 12        | 96223526        | 0.69                 | 0.97     | rs2302902        |                        | 13 tissues             | GI                  |                    |                         | RP11-394J1.2     | intronic         |              |             |                  |
| 12        | 96224030        | 0.69                 | 0.97     | rs4762138        |                        | 11 tissues             | 10 tissues          | BATF, NFKB         | Pou2f2                  | ELK3             | intronic         |              |             |                  |
| 12        | 96224128        | 0.69                 | 0.98     | rs4762139        |                        | 11 tissues             | 11 tissues          | BATF               | 8 altered motifs        | ELK3             | intronic         |              |             |                  |
| 12        | 96224985        | 0.23                 | -0.91    | rs2300553        | BRN                    | 13 tissues             | 5 tissues           |                    | 5 altered motifs        | ELK3             | intronic         |              |             |                  |
| 12        | 96228656        | 0.3                  | 0.61     | rs10777775       |                        |                        | SKIN                |                    | 4 altered motifs        | ELK3             | intronic         |              |             |                  |
| 12        | 96229248        | 0.61                 | 0.93     | rs11108446       |                        | 8 tissues              | 11 tissues          |                    | Hoxb8,Hsf,Sox           | ELK3             | intronic         |              |             |                  |
| 12        | 96230342        | 0.6                  | 0.92     | rs9971896        |                        | FAT, BRST, SKIN        |                     |                    | 4 altered motifs        | ELK3             | intronic         |              |             |                  |
| 12        | 96232578        | 0.27                 | 0.69     | rs9971785        |                        | 4 tissues              |                     |                    | 18 altered motifs       | ELK3             | intronic         |              |             |                  |
| 12        | 96236848        | 0.28                 | 0.64     | rs10777776       |                        |                        | BLD,BLD,BRN         | CTCF               |                         | ELK3             | intronic         |              |             |                  |

|    |          |      |      |             |           |              |              |                |                     |                   |          |  |  |  |
|----|----------|------|------|-------------|-----------|--------------|--------------|----------------|---------------------|-------------------|----------|--|--|--|
| 12 | 96236970 | 0.21 | 0.84 | rs7975154   | 4 tissues | 16 tissues   | 9 tissues    |                | 5 altered motifs    | ELK3              | intronic |  |  |  |
| 12 | 96237097 | 0.2  | 0.84 | rs7978130   | 5 tissues | 16 tissues   | 15 tissues   |                | Ets                 | ELK3              | intronic |  |  |  |
| 12 | 96258192 | 0.23 | 0.77 | rs2268502   |           | 22 tissues   | 21 tissues   |                | Maf,NF-E2,SIX5      | ELK3              | intronic |  |  |  |
| 12 | 96258580 | 0.26 | 0.54 | rs10745751  |           |              | 20 tissues   |                | Foxa                | ELK3              | intronic |  |  |  |
| 12 | 96260907 | 0.27 | 0.55 | rs7138031   |           | 6 tissues    | 5 tissues    | POL2,<br>POL2B |                     | ELK3              | intronic |  |  |  |
| 12 | 96264612 | 0.3  | 0.59 | rs2300550   |           | 6 tissues    | BLD,VAS,SKIN | POL2B          |                     | ELK3              | intronic |  |  |  |
| 12 | 96266933 | 0.29 | 0.59 | rs7974921   |           | SKIN         | BLD,VAS      | POL2B          | HNF1,Hoxa4,Prrx2    | ELK3              | intronic |  |  |  |
| 12 | 96277913 | 0.29 | 0.58 | rs10777780  |           |              |              |                | Fox,Foxi1,Pou5f1    | 347bp 3' of CDK17 |          |  |  |  |
| 12 | 96283165 | 0.24 | 0.51 | rs61938858  |           | GI, HRT      |              |                | Hsf,SRF             | CDK17             | intronic |  |  |  |
| 12 | 96290592 | 0.28 | 0.58 | rs7485280   |           |              |              |                | Pou5f1,RFX5         | CDK17             | intronic |  |  |  |
| 12 | 96291444 | 0.29 | 0.58 | rs10860011  |           |              |              |                | Gm397,Mtf1,Pax-5    | CDK17             | intronic |  |  |  |
| 12 | 96293047 | 0.28 | 0.58 | rs11108455  |           |              |              |                | 6 altered motifs    | CDK17             | intronic |  |  |  |
| 12 | 96298065 | 0.25 | 0.53 | rs4762295   |           |              |              |                | HES1,RXRA           | CDK17             | intronic |  |  |  |
| 12 | 96300924 | 0.25 | 0.53 | rs139772832 |           | BRN, LNG     |              |                | 9 altered motifs    | CDK17             | intronic |  |  |  |
| 12 | 96301550 | 0.32 | 0.67 | rs10860013  |           |              |              |                |                     | CDK17             | intronic |  |  |  |
| 12 | 96301660 | 0.29 | 0.58 | rs10777782  |           |              |              |                | 5 altered motifs    | CDK17             | intronic |  |  |  |
| 12 | 96302216 | 0.29 | 0.58 | rs9971815   |           | BRN, VAS     |              |                | DMRT2,GATA,Sox      | CDK17             | intronic |  |  |  |
| 12 | 96303823 | 0.28 | 0.57 | rs12313403  |           | 7 tissues    | 10 tissues   | RAD21          | GR                  | CDK17             | intronic |  |  |  |
| 12 | 96304859 | 0.25 | 0.53 | rs10777783  |           |              |              |                | Cdx                 | CDK17             | intronic |  |  |  |
| 12 | 96314497 | 0.26 | 0.58 | rs10745753  |           |              | ADRL,HRT,BLD |                | ERalpha-a,RORalpha1 | CDK17             | intronic |  |  |  |
| 12 | 96322285 | 0.25 | 0.56 | rs10777784  |           |              |              |                | Mef2                | CDK17             | intronic |  |  |  |
| 12 | 96334248 | 0.26 | 0.57 | rs9308300   |           | 6 tissues    |              |                | Mef2,Zfp105         | CDK17             | intronic |  |  |  |
| 12 | 96343062 | 0.22 | 0.48 | rs11108475  |           | BLD, VAS     | BLD          |                | 7 altered motifs    | CDK17             | intronic |  |  |  |
| 12 | 96344775 | 0.22 | 0.48 | rs10860019  |           |              |              | KAP1           | Pax-4               | CDK17             | intronic |  |  |  |
| 12 | 96347530 | 0.25 | 0.51 | rs11503397  | 5 tissues | 11 tissues   | 10 tissues   |                | ATF3,AhR            | CDK17             | intronic |  |  |  |
| 12 | 96347598 | 0.24 | 0.49 | rs61939062  | 5 tissues | 11 tissues   | 5 tissues    |                | 14 altered motifs   | CDK17             | intronic |  |  |  |
| 12 | 96348605 | 0.24 | 0.54 | rs10745758  |           |              | SKIN         |                |                     | CDK17             | intronic |  |  |  |
| 12 | 96353932 | 0.22 | 0.52 | rs10860021  |           |              | BLD,LNG      |                | AP-1,Pax-8,TBX5     | CDK17             | intronic |  |  |  |
| 12 | 96357513 | 0.22 | 0.52 | rs7973336   |           | 10 tissues   | GI,SKIN      |                | CDP,HNF1            | CDK17             | intronic |  |  |  |
| 12 | 96361319 | 0.24 | 0.54 | rs7974022   | BLD, GI   | 15 tissues   | 10 tissues   |                | 5 altered motifs    | CDK17             | intronic |  |  |  |
| 12 | 96365296 | 0.23 | 0.53 | rs10860024  |           |              |              |                |                     | CDK17             | intronic |  |  |  |
| 12 | 96369430 | 0.24 | 0.53 | rs10860025  |           |              |              |                | 15 altered motifs   | CDK17             | intronic |  |  |  |
| 12 | 96373379 | 0.24 | 0.53 | rs3925974   |           | 15 tissues   |              |                | 7 altered motifs    | CDK17             | intronic |  |  |  |
| 12 | 96377611 | 0.23 | 0.51 | rs10860028  |           |              | 9 tissues    |                | 5 altered motifs    | CDK17             | intronic |  |  |  |
| 12 | 96378257 | 0.23 | 0.51 | rs1583793   | BLD       | BLD, GI, VAS | 5 tissues    |                | BDP1                | CDK17             | intronic |  |  |  |

|    |           |      |       |            |            |                 |            |                  |                    |       |          |  |  |  |
|----|-----------|------|-------|------------|------------|-----------------|------------|------------------|--------------------|-------|----------|--|--|--|
| 12 | 96385148  | 0.22 | 0.51  | rs10860030 |            |                 |            |                  | Mef2               | CDK17 | intronic |  |  |  |
| 12 | 96390447  | 0.24 | 0.52  | rs7305520  |            | 4 tissues       |            |                  | Eomes,TBX5,ZEB1    | CDK17 | intronic |  |  |  |
| 12 | 96392259  | 0.24 | 0.53  | rs10437881 |            |                 |            | VAS              | Foxj2              | CDK17 | intronic |  |  |  |
| 12 | 96394581  | 0.24 | 0.54  | rs6538709  |            | BLD, VAS        | BLD,MUS    |                  | HNF4,NRSF          | CDK17 | intronic |  |  |  |
| 12 | 96398788  | 0.22 | 0.54  | rs7968046  | 23 tissues | ESDR, IPSC, ESC | 32 tissues | POL2B            |                    | CDK17 | intronic |  |  |  |
| 10 | 124560664 | 0.36 | -0.66 | rs7915230  | 4 tissues  | 16 tissues      | 16 tissues | GR               | MOVO-B,VDR         | LHPP  | intronic |  |  |  |
| 10 | 124564186 | 0.27 | -0.87 | rs11245292 |            | HRT             |            |                  | 7 altered motifs   | LHPP  | intronic |  |  |  |
| 10 | 124565056 | 0.27 | -0.87 | rs10901760 |            |                 |            |                  |                    | LHPP  | intronic |  |  |  |
| 10 | 124565875 | 0.27 | -0.86 | rs7090456  | ESC, MUS   | 17 tissues      | 21 tissues | 4 bound proteins | 16 altered motifs  | LHPP  | intronic |  |  |  |
| 10 | 124570770 | 0.27 | -0.87 | rs3891517  |            | BLD             |            |                  | Mrg1::Hoxa9        | LHPP  | intronic |  |  |  |
| 10 | 124570862 | 0.27 | -0.87 | rs956692   |            | BLD             | BLD        |                  | 7 altered motifs   | LHPP  | intronic |  |  |  |
| 10 | 124571199 | 0.28 | -0.89 | rs10794153 |            |                 |            |                  | CCNT2,GATA         | LHPP  | intronic |  |  |  |
| 10 | 124571717 | 0.27 | -0.87 | rs12269523 |            | BLD             |            |                  |                    | LHPP  | intronic |  |  |  |
| 10 | 124571942 | 0.27 | -0.87 | rs72837376 |            | BLD             | BLD        |                  | CTCF,RREB-1,VDR    | LHPP  | intronic |  |  |  |
| 10 | 124572495 | 0.27 | -0.87 | rs12358685 |            |                 |            |                  | 8 altered motifs   | LHPP  | intronic |  |  |  |
| 10 | 124573497 | 0.27 | -0.87 | rs10794155 |            |                 |            |                  | Mef2,PLZF,ZEB1     | LHPP  | intronic |  |  |  |
| 10 | 124573884 | 0.27 | -0.86 | rs10901766 |            |                 |            |                  | 4 altered motifs   | LHPP  | intronic |  |  |  |
| 10 | 124574339 | 0.28 | -0.86 | rs4962382  |            | SKIN, BRN       |            |                  | 8 altered motifs   | LHPP  | intronic |  |  |  |
| 10 | 124574516 | 0.28 | -0.88 | rs4962383  |            | IPSC, THYM      |            |                  | BHLHE40,NF-E2,NRSF | LHPP  | intronic |  |  |  |
| 10 | 124574585 | 0.29 | -0.89 | rs4962384  |            | IPSC, THYM      |            |                  | 4 altered motifs   | LHPP  | intronic |  |  |  |
| 10 | 124574675 | 0.29 | -0.89 | rs56260700 |            | IPSC            |            |                  | GATA,Gfi1          | LHPP  | intronic |  |  |  |
| 10 | 124574696 | 0.28 | -0.88 | rs55762237 |            | IPSC            |            |                  | 8 altered motifs   | LHPP  | intronic |  |  |  |
| 10 | 124575333 | 0.29 | -0.88 | rs10901767 |            |                 |            |                  | AP-4,E2A,LBP-1     | LHPP  | intronic |  |  |  |
| 10 | 124575463 | 0.29 | -0.88 | rs10901768 |            |                 |            |                  | GR                 | LHPP  | intronic |  |  |  |
| 10 | 124576807 | 0.23 | -0.89 | rs4962658  |            |                 |            |                  | 7 altered motifs   | LHPP  | intronic |  |  |  |
| 10 | 124576960 | 0.37 | -0.88 | rs10901770 |            |                 |            |                  | SP1                | LHPP  | intronic |  |  |  |
| 10 | 124577264 | 0.31 | -0.83 | rs10751596 |            |                 |            |                  | BRCA1,GATA         | LHPP  | intronic |  |  |  |
| 10 | 124577503 | 0.37 | -0.88 | rs12250595 |            | BLD, THYM       | BRN        |                  | 5 altered motifs   | LHPP  | intronic |  |  |  |
| 10 | 124579799 | 0.27 | -0.89 | rs10901771 |            |                 | HRT,MUS    |                  |                    | LHPP  | intronic |  |  |  |
| 10 | 124579802 | 0.29 | -0.79 | rs10901772 |            |                 | HRT,MUS    |                  | Pax-5              | LHPP  | intronic |  |  |  |
| 10 | 124590335 | 0.33 | -0.88 | rs10901776 |            |                 | 6 tissues  | CTCF             | BDP1,Pax-6,Spz1    | LHPP  | intronic |  |  |  |
| 10 | 124592024 | 0.39 | -0.95 | rs4962664  |            |                 |            |                  | Maf,Nkx2           | LHPP  | intronic |  |  |  |
| 10 | 124592104 | 0.34 | -0.88 | rs4962665  |            | BLD             |            |                  | GATA,KAP1,p53      | LHPP  | intronic |  |  |  |
| 10 | 124594058 | 0.34 | -0.88 | rs10901777 |            |                 | ADRL       |                  | 4 altered motifs   | LHPP  | intronic |  |  |  |
| 10 | 124595400 | 0.2  | -0.96 | rs4962666  |            | BLD, THYM       |            |                  |                    | LHPP  | intronic |  |  |  |

|           |                  |          |          |                   |                |                   |                  |                          |                        |             |                 |              |             |          |
|-----------|------------------|----------|----------|-------------------|----------------|-------------------|------------------|--------------------------|------------------------|-------------|-----------------|--------------|-------------|----------|
| 10        | 124595640        | 0.33     | -0.76    | rs4962667         |                | BLD, THYM         | 5 tissues        | TAL1                     | 4 altered motifs       | LHPP        | intronic        |              |             |          |
| 10        | 124595767        | 0.22     | 0.97     | rs34496154        |                | BLD, THYM         | 5 tissues        |                          | LUN-1,SRF              | LHPP        | intronic        |              |             |          |
| 10        | 124595846        | 0.22     | 0.97     | rs61870251        |                | BLD, THYM         | 4 tissues        |                          | Nanog                  | LHPP        | intronic        |              |             |          |
| 10        | 124595931        | 0.2      | -0.96    | rs4962668         |                | BLD, THYM         | BLD              |                          | Maf                    | LHPP        | intronic        |              |             |          |
| 10        | 124596868        | 0.21     | -0.98    | rs11245308        | LIV            | 5 tissues         | IPSC,BLD         |                          | Nkx3,OTX               | LHPP        | intronic        |              |             |          |
| 10        | 124597368        | 0.36     | -0.89    | rs1123987         |                | 7 tissues         | HRT,GI           |                          | 6 altered motifs       | LHPP        | intronic        |              |             |          |
| 10        | 124598237        | 0.22     | 0.99     | rs34042290        |                | 4 tissues         | THYM             |                          | NF-kappaB              | LHPP        | intronic        |              |             |          |
| 10        | 124598536        | 0.34     | -0.85    | rs731622          |                | 4 tissues         | VAS              |                          | 6 altered motifs       | LHPP        | intronic        |              |             |          |
| 10        | 124599410        | 0.38     | -0.94    | rs10901778        |                |                   | BLD              |                          | TATA                   | LHPP        | intronic        |              |             |          |
| 10        | 124599835        | 0.38     | -0.94    | rs1563282         |                | 5 tissues         | BLD,BLD,BLD      |                          |                        | LHPP        | intronic        |              |             |          |
| 10        | 124600025        | 0.38     | -0.94    | rs1123988         |                | 5 tissues         | THYM             |                          | GR,Pax-5,STAT          | LHPP        | intronic        |              |             |          |
| 10        | 124600888        | 0.21     | -0.98    | rs11599414        |                | 7 tissues         | BLD,ADRL,THYM    |                          | BCL,CDP,NF-kappaB      | LHPP        | intronic        |              |             |          |
| 10        | 124601269        | 0.39     | -0.95    | rs10901779        |                |                   | BLD,BLD,BLD      |                          | 7 altered motifs       | LHPP        | intronic        |              |             |          |
| 10        | 124602481        | 0.21     | -0.98    | rs9783260         |                | 6 tissues         |                  |                          | 7 altered motifs       | LHPP        | intronic        |              |             |          |
| 10        | 124602776        | 0.21     | -0.98    | rs9783263         |                | 7 tissues         | BLD              |                          | 10 altered motifs      | LHPP        | intronic        |              |             |          |
| 10        | 124603049        | 0.4      | -0.96    | rs10901780        |                |                   | BLD              |                          | HDAC2,PLAG1,TLX1::NFIC | LHPP        | intronic        |              |             |          |
| 10        | 124603787        | 0.28     | 0.94     | rs2885520         | LIV            | 8 tissues         | ESC              |                          | AP-2,NF-I,NRSF         | LHPP        | intronic        |              |             |          |
| 10        | 124603928        | 0.34     | 0.79     | rs2362511         | LIV            | 9 tissues         | 5 tissues        |                          | 12 altered motifs      | LHPP        | intronic        |              |             |          |
| 10        | 124604086        | 0.84     | 0.95     | rs12779301        | LIV            | 9 tissues         | THYM,BLD         |                          | CTCF,RBP-Jkappa        | LHPP        | intronic        |              |             |          |
| 10        | 124604169        | 0.84     | 0.95     | rs12779515        | LIV            | 9 tissues         | MUS              |                          |                        | LHPP        | intronic        |              |             |          |
| 10        | 124604199        | 0.21     | -0.98    | rs9783250         | LIV            | 9 tissues         |                  |                          | 5 altered motifs       | LHPP        | intronic        |              |             |          |
| 10        | 124604391        | 0.38     | -0.96    | rs10901781        |                |                   | BLD,SKIN,THYM    | GATA2                    | NRSF,Rad21             | LHPP        | intronic        |              |             |          |
| <b>10</b> | <b>124604740</b> | <b>1</b> | <b>1</b> | <b>rs35837782</b> | <b>BRN</b>     | <b>10 tissues</b> | <b>7 tissues</b> |                          | <b>Hic1</b>            | <b>LHPP</b> | <b>intronic</b> | <b>1.284</b> | <b>-4.5</b> | <b>5</b> |
| 10        | 124604790        | 0.89     | 0.99     | rs12765129        | BRN            | 10 tissues        | 7 tissues        |                          | 4 altered motifs       | LHPP        | intronic        |              |             |          |
| 10        | 124605150        | 0.38     | 0.85     | rs11812870        | BRN            | 11 tissues        | 7 tissues        |                          | 4 altered motifs       | LHPP        | intronic        |              |             |          |
| 10        | 124605409        | 0.42     | -1       | rs3740541         | ESDR, BRN, LIV | 9 tissues         | BLD,THYM         |                          | NF-kappaB,Rad21        | LHPP        | intronic        |              |             |          |
| 10        | 124605598        | 0.22     | 0.99     | rs3740540         | BRN, LIV       | 10 tissues        | ESDR             |                          | ERalpha-a,Mrg          | LHPP        | intronic        |              |             |          |
| 10        | 124605715        | 0.74     | 0.88     | rs12771808        | ESDR, BRN, LIV | 8 tissues         | KID              |                          |                        | LHPP        | intronic        |              |             |          |
| 10        | 124605790        | 0.52     | 0.99     | rs10901782        |                |                   | 4 tissues        |                          | BCL,Ik-2,STAT          | LHPP        | intronic        |              |             |          |
| 10        | 124605911        | 0.88     | 0.99     | rs12777136        | BRN, LIV       | 9 tissues         | 6 tissues        | CMYC,MAX                 | ATF3,ERalpha-a,HNF4    | LHPP        | intronic        |              |             |          |
| 10        | 124605932        | 0.42     | -0.99    | rs10901783        |                |                   | 7 tissues        | CMYC,MAX                 | 5 altered motifs       | LHPP        | intronic        |              |             |          |
| 10        | 124606098        | 0.52     | 0.99     | rs4962391         | BLD, BRN, LIV  | 10 tissues        | 5 tissues        |                          | KAP1                   | LHPP        | intronic        |              |             |          |
| 10        | 124606304        | 0.2      | -0.96    | rs4962392         | BLD, BRN, LIV  | 11 tissues        | 4 tissues        | 4 bound proteins         | EWSR1-FLI1,NRSF,Pbx3   | LHPP        | intronic        |              |             |          |
| 10        | 124606497        | 0.49     | 0.95     | rs11307680        | BRN, LIV       | 12 tissues        | 4 tissues        | HNF4A,<br>HNF4G,<br>POL2 | 17 altered motifs      | LHPP        | intronic        |              |             |          |

|    |           |      |       |            |           |                |              |      |                   |      |          |  |  |  |
|----|-----------|------|-------|------------|-----------|----------------|--------------|------|-------------------|------|----------|--|--|--|
| 10 | 124606694 | 0.41 | -0.99 | rs11245312 | BRN, LIV  | 12 tissues     | BLD,THYM     |      | GR,NRSF           | LHPP | intronic |  |  |  |
| 10 | 124606842 | 0.51 | 0.97  | rs7907954  | BRN, LIV  | 14 tissues     | KID,GI,LIV   |      | 5 altered motifs  | LHPP | intronic |  |  |  |
| 10 | 124606936 | 0.21 | -0.98 | rs11594077 | BRN, LIV  | 14 tissues     | 5 tissues    |      | Pax-5             | LHPP | intronic |  |  |  |
| 10 | 124606939 | 0.21 | 0.97  | rs35986134 | BRN, LIV  | 14 tissues     | 5 tissues    |      |                   | LHPP | intronic |  |  |  |
| 10 | 124606986 | 0.88 | 0.99  | rs7923479  | BRN, LIV  | 14 tissues     | 5 tissues    |      | 8 altered motifs  | LHPP | intronic |  |  |  |
| 10 | 124607077 | 0.74 | -0.99 | rs10901785 |           |                | 7 tissues    |      | 6 altered motifs  | LHPP | intronic |  |  |  |
| 10 | 124607212 | 0.41 | -0.98 | rs11245313 | BRN, LIV  | 11 tissues     | BLD,THYM,LIV |      | 5 altered motifs  | LHPP | intronic |  |  |  |
| 10 | 124607521 | 0.21 | 0.97  | rs12761008 | BRN       | 6 tissues      | BRN          |      |                   | LHPP | intronic |  |  |  |
| 10 | 124607814 | 0.21 | -0.98 | rs2061069  | BRN       | 4 tissues      | IPSC         |      | NRSF,PU.1         | LHPP | intronic |  |  |  |
| 10 | 124607842 | 0.21 | -1    | rs2061070  | SKIN, BRN | 5 tissues      | IPSC         |      | 4 altered motifs  | LHPP | intronic |  |  |  |
| 10 | 124608056 | 0.28 | -0.76 | rs12249375 | BRN       | 9 tissues      | 5 tissues    |      | 9 altered motifs  | LHPP | intronic |  |  |  |
| 10 | 124608639 | 0.56 | 0.89  | rs11245314 |           | 7 tissues      |              | USF1 | 4 altered motifs  | LHPP | intronic |  |  |  |
| 10 | 124608691 | 0.24 | -0.75 | rs67233244 |           | 7 tissues      |              |      | 18 altered motifs | LHPP | intronic |  |  |  |
| 10 | 124609101 | 0.22 | 0.96  | rs11245315 |           | 4 tissues      |              |      | DMRT1,DMRT7       | LHPP | intronic |  |  |  |
| 10 | 124609616 | 0.21 | -0.66 | rs11245316 |           | BLD, BRN, THYM |              |      | Klf7              | LHPP | intronic |  |  |  |
| 10 | 124609777 | 0.21 | -0.66 | rs10901787 |           |                | OVRY         | CTCF | Irf               | LHPP | intronic |  |  |  |
| 10 | 124611031 | 0.35 | -0.66 | rs12355969 |           | 4 tissues      | THYM         |      | HDAC2,NRSF,Pou2f2 | LHPP | intronic |  |  |  |
| 10 | 124611427 | 0.23 | -0.68 | rs66631105 | BLD       | 11 tissues     | 5 tissues    |      | Sin3Ak-20,WT1     | LHPP | intronic |  |  |  |

**Table S9: Epigenetic annotation of genome-wide significant SNPs.** Data are shown for query SNPs and their proxies ( $r^2 > 0.2$  in 1000 Genomes EUR Phase 1 data) demonstrating evidence of histone marks, DNase hypersensitivity sites or transcription factor occupancy in RegulomeDB analysis. Also indicated are genomic evolutionary rate profiling (GERP) scores and combined annotation dependent depletion (CADD) scores. Chr, chromosome; DNase HS, DNase hypersensitivity; Fre, frequency; GERP, Genomic Evolutionary Rate Profiling; LD, linkage disequilibrium; Pos, position; CADD, combined annotation dependent depletion. RegulomeDB scores: 2b, TF binding + any motif + Dnase Footprint + Dnase peak; 4, TF binding + DNase peak; 5, TF binding or Dnase peak; 6, other binding or Dnase peak.

| P-value  | SNP       | SNP Chr. | SNP Chr. Position | Probe   | Probe Chr. | Probe Chr. position | SNP Alleles | Minor Allele | Z-score | Gene name | *FDR |
|----------|-----------|----------|-------------------|---------|------------|---------------------|-------------|--------------|---------|-----------|------|
| 6.85E-04 | rs4762284 | 12       | 95136893          | 3420014 | 12         | 95181371            | T/A         | T            | -3.4    | ELK3      | 0.2  |

**Table S10: eQTL analysis in LCL and blood tissues for rs4762284 using the eQTL blood browser online resources.** Genes within 1 Mb of query SNP were assessed for association. \*FDR: False discovery rate values shown are from 'probe level' rates as described by Westra H. *et al*, Nat.Gen (2012).



| SNP Oligo name/Allele | Sequence                                                |
|-----------------------|---------------------------------------------------------|
| rs12751998_ALG        | GAAGGTGACCAAGTTCATGCTATTTACAGTTGTCTACTCCCCCG            |
| rs12751998_ALT        | GAAGGTCGGAGTCAACGGATTCAATTTACAGTTGTCTACTCCCCCT          |
| rs12751998_C1         | ACTGGGAGCAAAAGAAGATGAGAGAAAA                            |
| rs890579_ALC          | GAAGGTGACCAAGTTCATGCTGGTATTTTAAAAATAATCCATGAAAAACAATGG  |
| rs890579_ALT          | GAAGGTCGGAGTCAACGGATTGGTATTTTAAAAATAATCCATGAAAAACAATGA  |
| rs890579_C1           | CCCAGGGTGCAGATTTACTCTCTTT                               |
| rs74952692_ALC        | GAAGGTGACCAAGTTCATGCTGTGCCTTGCATCCCCTTAGC               |
| rs74952692_ALT        | GAAGGTCGGAGTCAACGGATTGTGCCTTGCATCCCCTTAGT               |
| rs74952692_C2         | GCAGCCTCAGGAACTTACAGTCAT                                |
| rs16852911_ALA        | GAAGGTGACCAAGTTCATGCTAGCAGAAATGCCACGAATACAGAGA          |
| rs16852911_ALT        | GAAGGTCGGAGTCAACGGATTAGCAGAAATGCCACGAATACAGAGT          |
| rs16852911_C1         | TTCCTACTGTTTCTGGGAACCTTAGACTTT                          |
| rs145666495_ALG       | GAAGGTGACCAAGTTCATGCTACCGCCCCAGTAAAGCCCCG               |
| rs145666495_ALT       | GAAGGTCGGAGTCAACGGATTCTACCGCCCCAGTAAAGCCCT              |
| rs145666495_C1        | TCAGTGCCTTAAGAAAGGCAGCCT                                |
| rs6933843_ALG         | GAAGGTGACCAAGTTCATGCTAAGGAGAAAAGAGAAAGTATGAAAAAGTAG     |
| rs6933843_ALT         | GAAGGTCGGAGTCAACGGATTCAAGGAGAAAAGAGAAAGTATGAAAAAGTAT    |
| rs6933843_C1          | AGATCCCTAATGCTGTCTGGTCCAT                               |
| rs62579834_ALA        | GAAGGTGACCAAGTTCATGCTGCATGAACAGCCTGCTCAGAACA            |
| rs62579834_ALC        | GAAGGTCGGAGTCAACGGATTGATGAACAGCCTGCTCAGAACC             |
| rs62579834_C1         | TGCAGTTGAAGCATGAGCTGAGGAT                               |
| rs35837782_ALA        | GAAGGTGACCAAGTTCATGCTCCCTCTGATGCCAGTGCCCA               |
| rs35837782_ALG        | GAAGGTCGGAGTCAACGGATTCTCTGATGCCAGTGCCCG                 |
| rs35837782_C1         | GGGGCGGCTGCCAGTGAA                                      |
| rs16937230_ALC        | GAAGGTGACCAAGTTCATGCTGGTGCTCACGTCCCTGG                  |
| rs16937230_ALT        | GAAGGTCGGAGTCAACGGATTGCTGGTGCTCACGTCCCTGA               |
| rs16937230_C1         | GTCTCCACAGAGGAGGAGGACAT                                 |
| rs1001205_ALC         | GAAGGTGACCAAGTTCATGCTACTGCTCTGCAGATAGGCTAGG             |
| rs1001205_ALT         | GAAGGTCGGAGTCAACGGATTCACTGCTCTGCAGATAGGCTAGA            |
| rs1001205_C1          | CAGCCTTGGCTGAACCAACCCTT                                 |
| rs1419981_ALA         | GAAGGTGACCAAGTTCATGCTCATCAGACATCAGCCCAGGGT              |
| rs1419981_ALG         | GAAGGTCGGAGTCAACGGATTGATCAGACATCAGCCCAGGGC              |
| rs1419981_C1          | GTCAGGCAATGGCAATTAAGTCTAGCT                             |
| rs4762284_ALA         | GAAGGTGACCAAGTTCATGCTCACATAAAAGGCATGCTAGAAATCTTTTTTTT   |
| rs4762284_ALT         | GAAGGTCGGAGTCAACGGATTACATAAAAGGCATGCTAGAAATCTTTTTTTTA   |
| rs4762284_C1          | GCGCCCGGCCAAGATAAGCATT                                  |
| rs7152152_ALC         | GAAGGTGACCAAGTTCATGCTTTGGGGGAACAGGGACAATG               |
| rs7152152_ALT         | GAAGGTCGGAGTCAACGGATTCTTTGGGGGAACAGGGACAATA             |
| rs7152152_C2          | GCACCCTGGTTGGTACATGGTTAAT                               |
| rs10148274_ALA        | GAAGGTGACCAAGTTCATGCTAATTTCAAAAAGTGGAAAATTTACGAATGAAAT  |
| rs10148274_ALC        | GAAGGTCGGAGTCAACGGATTAAATTTCAAAAAGTGGAAAATTTACGAATGAAAG |
| rs10148274_C2         | GAAGCCCGATTTTGGAAATCAGATCTTAA                           |
| rs4448919_ALA         | GAAGGTGACCAAGTTCATGCTTCCCACTGAGCCTTAAGTTGGTA            |
| rs4448919_ALG         | GAAGGTCGGAGTCAACGGATTCCCACTGAGCCTTAAGTTGGTG             |
| rs4448919_C1          | CCATCAATATATTGCAGCGAGACAATGAA                           |
| rs10411772_ALA        | GAAGGTGACCAAGTTCATGCTCCTCTGCCTTACCTTCCAACA              |
| rs10411772_ALC        | GAAGGTCGGAGTCAACGGATTCTCTGCCTTACCTTCCAACC               |
| rs10411772_C1         | TTAATGACAGGGTCTGGCTCTCAT                                |
| rs12751998_F          | TCCTGTTTGTAAACCACTTTCC                                  |

|               |                           |
|---------------|---------------------------|
| rs12751998    | TGCCTGGCTATTTTATCCCTCG    |
| rs890579_F    | CAGCACTGGTAGAGGCTGAC      |
| rs890579      | GGATGACAGAGAACAAGATTAGACA |
| rs74952692_F  | TTTCCTATGCTGTCCACCCT      |
| rs74952692    | ACAACCCTTACCACACCTCA      |
| rs16852911_F  | GGAGACCCTCTCCACAGTGA      |
| rs16852911_R  | GCACAGCAAGTGGGAAAGTG      |
| rs145666495_F | GCCCAACAATGCCCTCAAAT      |
| rs145666495_R | CAAGTGGCAAGCTCAGGAAG      |
| rs3748079_F   | GGGTCAGCAGCTGTCTCTTT      |
| rs3748079_R   | CAGAGCACCCAAGCGCTAA       |
| rs6933843_F   | TGCTGGGACATGTGGAAGTC      |
| rs6933843_R   | AGCATTTAGGGAGACAATGGGA    |
| rs62579834_F  | TGTGGCCATAACTACTCAGCA     |
| rs62579834_R  | TTCCCCAGACCTCGTTGTAC      |
| rs35837782_F  | CACGTGGACAGCAGGGAAC       |
| rs35837782_R  | GGGGCAGAGACTCTACAAC       |
| rs16937230_F  | CCGCGTCACCCATCTAATGA      |
| rs16937230_R  | GGGCTGGATTCTCCCTCTT       |
| rs1001205_F   | TCGTGTTCTGGAGGAGAGAA      |
| rs1001205_R   | TTCTCCTGGATCTGGCTCA       |
| rs1419981_F   | TTCTGTTTCCCCTAGGCTGG      |
| rs1419981_R   | AGCACAAGTCCTGGTCCAAT      |
| rs4762284_F   | TTGGGTGGTGGGTATGCTAG      |
| rs4762284_R   | CATGGAGGCCTGCTCTAAGT      |
| rs7152152_F   | CTTGCTTCCAGTGGTGTCCC      |
| rs7152152_R   | GCCCTTCAAGACAGTCCAGG      |
| rs10148274_F  | TGATCCCCTCTCCTATGCAC      |
| rs10148274_R  | GCTGTCTTGTAATGCACCCG      |
| rs4448919_F   | TCGGGACCCTGACTGTTTC       |
| rs4448919_R   | TGTGGTTCTGGCAGAGTAGG      |
| rs10411772_F  | CGCCAGTCACATCCACTCAT      |
| rs10411772_R  | TCCTGAGGCTTCCCCTTACT      |

**Table S11: Oligonucleotides used in this study for KASPAR genotyping and Sanger sequencing.**
